1 Title

2

3 **Breakdown in seasonal dynamics of ant communities with land-cover change**

4

5 Authors

6

7 Jamie M. Kass<sup>1</sup>, Masashi Yoshimura<sup>2</sup>, Masako Ogasawara<sup>2</sup>, Mayuko Suwabe<sup>2</sup>, Francisco Hita  
8 Garcia<sup>1</sup>, Georg Fischer<sup>1</sup>, Kenneth L. Dudley<sup>2</sup>, Ian Donohue<sup>3</sup>, Evan P. Economo<sup>1</sup>

9 1. Biodiversity and Biocomplexity Unit, Okinawa Institute of Science and Technology  
10 Graduate University, Onna, Okinawa, Japan

11 2. Environmental Science and Informatics, Okinawa Institute of Science and Technology  
12 Graduate University, Onna, Okinawa, Japan

13 3. Zoology, School of Natural Sciences, Trinity College Dublin, Dublin, Ireland

14

15 Abstract

16 Concerns about widespread human-induced declines in insect populations are mounting, yet little  
17 is known about how land-use change modifies the dynamics of insect communities, particularly  
18 in understudied biomes. Here we examine how the seasonal patterns of ant activity, key drivers  
19 of ecosystem functioning, vary with human-induced land cover change on a subtropical island  
20 landscape. Using trap captures sampled biweekly from a biodiversity monitoring network  
21 covering Okinawa Island, Japan, we processed 1.2 million individuals and reconstructed activity  
22 patterns within and across habitat types. We determined that communities inside the forest  
23 exhibited more variability than those in more developed areas. Using time-series decomposition  
24 to deconstruct this pattern, we found that ant communities at sites with greater human  
25 development exhibited diminished seasonality, reduced synchrony, and higher stochasticity  
26 compared to those at sites with greater forest cover. We demonstrate that our results cannot be  
27 explained by variation in either regional or *in situ* temperature patterns, or by differences in  
28 species richness or composition among sites. We conclude that the breakdown of natural  
29 seasonal patterns of functionally key insect communities may comprise an important and  
30 underappreciated consequence of global environmental change that must be better understood  
31 across Earth's biomes.

32

33 Keywords

34 ant, insect, monitoring, Japan, subtropics, synchrony, temporal, variability

35

## 36 Introduction

37 Insects comprise 95% of described terrestrial animal species on Earth and are key drivers of a  
38 multitude of ecosystem functions and services, including pollination, food provisioning, pest  
39 control, water filtration, carbon sequestration, and decomposition (Schowalter, 2013). There is  
40 also mounting concern about the possibility of long-term global insect declines due to human-  
41 induced environmental change, which can disrupt key functions and services (Goulson, 2019;  
42 Wagner, 2020). But while such trends measured over broad timescales are informative for  
43 monitoring populations (Dornelas et al., 2013), they overlook changes in natural seasonal  
44 patterns that can only be detected at fine temporal resolutions. When these seasonal patterns are  
45 broken down by human pressures, it can result in the erosion of biodiversity (Tonkin et al., 2017)  
46 and degradation of the ecosystem functions and services on which human societies depend (Ross  
47 et al., 2021; Stevenson et al., 2015). For this reason, a better understanding is needed of how  
48 fine-scale temporal patterns of insect communities are affected in this era of global change.

49  
50 Land-cover modification is a major driver of biodiversity loss (Cardinale et al., 2012), and many  
51 studies have examined its consequences for insect diversity (e.g., Castro et al., 2018; Corro et al.,  
52 2019; Knop, 2016; Oliver et al., 2016; Senapathi et al., 2015). However, the corresponding  
53 effects on temporal dynamics of insect communities are not well-known. For example, human-  
54 altered land cover with higher densities of alien species can lead to boom-and-bust dynamics that  
55 cause high variability (Lester & Gruber, 2016; Simberloff & Gibbons, 2004). At the same time,  
56 urbanization can lead to biotic homogenization and reduced community variability over time  
57 (Hung et al., 2017; McKinney, 2006). Although these documented effects of land-cover change  
58 on insect temporal dynamics differ, investigations into how insect communities are affected are  
59 crucial for tropical and subtropical biomes undergoing rapid land-cover change (Janzen &  
60 Hallwachs, 2021), and also for islands that have restricted land area, frequent introductions of  
61 alien species, and exposure to increasingly extreme weather events (Russell & Kueffer, 2019).

62  
63 Here, we examine the effects of anthropogenic land-cover change on the fine-scale temporal  
64 variability of ant community activity. Ants are a dominant insect group in the many  
65 environments they inhabit around the world, underpinning a broad spectrum of ecological  
66 interactions and playing a major role in regulating ecosystem function (Hölldobler & Wilson,  
67 1990), which makes them ideal bioindicators for ecosystem change (Andersen & Majer, 2004).  
68 Community seasonality is linked to the maintenance of key ecosystem functions and services  
69 (Stevenson et al., 2015). However, even though ants can exhibit significant seasonality in  
70 tropical and subtropical regions (Basu, 1997; Samways, 1990), little is known about how land-  
71 cover change affects ant community seasonality in these diverse biomes.

72  
73 To address this, we used high-resolution (biweekly) monitoring data on ant activity for  
74 subtropical Okinawa Island in southern Japan to examine whether, and how, the temporal  
75 variability of ant communities varies with land cover change. We then determined which  
76 temporal components of variability (i.e., seasonality, trend, or stochasticity) contribute the most  
77 to differences across the gradient (Fig. S1). We also tested whether other potential drivers,  
78 including differences across sites in climate seasonality, species richness, and community  
79 composition, could be responsible for observed differences in temporal community variability,  
80 and additionally examined the roles played by invasive species in moderating these effects.

## 81 Materials and Methods

### 82 *Study sites and land-cover data*

83 Our study focuses on the subtropical main island of Okinawa in the southern Ryukyu archipelago  
84 of Japan. The island has a historical land-cover gradient, spanning from the minimally developed  
85 north to the more urban south (Fig. 1). Okinawa's extensive Yambaru Forest in the north was  
86 recently recognized as part of Japan's newest Natural World Heritage Site for its high endemism  
87 and biodiversity. Although the island is only 0.3% of Japan's total land area, it provides habitat  
88 to more than one-third of the country's ant species (Terayama et al. 2009, Terayama et al. 2014).  
89 The few studies of ant communities in Okinawa include biodiversity surveys (e.g., Ito et al.,  
90 1998) and comparisons between native and alien ant populations in Yambaru (Katayama &  
91 Tsuji, 2010; Suwabe et al., 2009; Yamauchi & Ogata, 1995). This study, the first to sample  
92 island-wide ant diversity and temporal patterns in Okinawa, uses data from a biodiversity  
93 monitoring system covering the land-cover gradient of the island, administered by the Okinawa  
94 Environmental Observation Network (OKEON) Churamori Project (<https://okeon.unit.oist.jp/>).

95  
96 We used a land-cover map for Okinawa (year 2015) to calculate representative land-cover values  
97 for the 24 OKEON monitoring sites. The sites (pairwise distances: minimum = 389 m, mean =  
98 33 km, maximum = 102 km) are located in or near forested areas across multiple land-cover  
99 types varying from broadly contiguous forest to highly agricultural or urban areas (Fig. 1). To  
100 characterize each site, we calculated the proportion of seven main land-cover classes (forest,  
101 agriculture, urban, grass, sand, freshwater, miscellaneous) around circular buffers with radius 1  
102 km (see Ross et al., 2018 for details). Buffers with this size were chosen to characterize  
103 representative land-cover values for areas surrounding sites without including regions that may  
104 have resident unsampled colonies. Sites near the coast included ocean area within the buffer, so  
105 we used relative proportions for all sites that considered only land area. As correlations were  
106 high between the main land-cover classes of interest (that is, forest, agriculture, and urban; Table  
107 S1), we used principal component analysis (R function *prcomp*) after applying an arcsine  
108 transformation to the proportions to improve normality (e.g., Van Buskirk, 2005) and retained  
109 the first and second axes (variance explained: PC1 = 81% and PC2 = 11%) for use as  
110 explanatory variables. PC1 represents the forested (high) to developed (low; urban and/or  
111 agriculture) gradient, while PC2 represents the rural (high; agriculture and/or grass) to urban  
112 (low) gradient (Fig. S2). All analyses were conducted in R (R Core Group, 2021), and spatial  
113 analyses were conducted with R packages *sf* (Pebesma, 2018) for vector data and *raster*  
114 (Hijmans, 2021) for gridded data.

115

### 116 *Ant activity data*

117 We sampled worker ant activity biweekly with Sea, Land, and Air Malaise (SLAM) traps for two  
118 years and identified samples to species level, resulting in 1,378,324 classified individuals.  
119 Specifically, we sampled one SLAM trap (Large BT1005, MegaView Science Co., Ltd.) at each  
120 of three stations per OKEON site (pairwise distances within sites: mean = 90 m, minimum = 19  
121 m, maximum = 195 m) every two weeks from March 2016 to March 2018 (further details in  
122 Supporting Information A). The stations are predominantly deployed under forest canopy,  
123 though several are in nearby open areas. This sampling method mainly targets terrestrial  
124 browsing species, though does occasionally catch arboreal and subterranean individuals. Insect

125 count data sampled with passive traps are usually interpreted as a measure of activity, or the rate  
126 at which individuals intersect a point in space, rather than direct estimates of abundance, though  
127 changes in abundance are generally reflected in ant activity data (Kaspari et al., 2022a).

128  
129 We additionally categorized all species by invasive status as either native, alien, or uncertain  
130 based on expert opinion and biogeographical databases (Guénard et al. 2017, Janicki et al. 2016,  
131 Terayama et al. 2009, <https://www.antwiki.org/>, <https://www.antweb.org/>). Native refers to  
132 species with enough data to establish historical occupancy in Okinawa without human-aided  
133 dispersal from other regions. Alien refers to species that definitively have native ranges in  
134 different regions and have dispersed to Okinawa via human activity. Uncertain species lack  
135 sufficient data to make such determinations.

136  
137 Some prevalent species had extreme count outliers, such as *Technomyrmex brunneus*  
138 (representing counts greater than 5,000), likely caused by large colony sizes and/or increased  
139 activity following mating flights, heterospecific competition, or other biological phenomena. We  
140 avoided bias in variability estimates by limiting count values to a conservative threshold of 500  
141 individuals for a given species at a station within a two-week period. We also examined changes  
142 in our results for a range of thresholds. For each species during each sampling period, we  
143 summed counts over the three stations per site to determine site-level activity (Fig. 2), and over  
144 all sites per land-cover group for grouped species-level activity. We then calculated total site  
145 density as the sum of all counts per site.

146  
147 Sampled abundance and variability can be correlated due to sampling error alone because of  
148 mean-variance scaling (McArdle & Gaston, 1995). For example, even if species dynamics are  
149 identical across two sites, if we sample fewer individuals from site A than site B (e.g., due to  
150 effects of sampling station placement), site B may have a higher temporal variability simply  
151 because its counts are higher. While in some sense this could reflect the actual variability of  
152 observed species at specific locations (that is, at the stations), we wanted to disentangle  
153 differences in community variability from those attributable to sampling error. Thus, we rarefied  
154 the data from all sites so that the total count (sum of all samples across the two years) for each  
155 site equals the total count at the site with the least abundance (Fig. S1, Supporting Information B;  
156 Gaston & McArdle, 1994). Finally, to determine whether species richness differences could  
157 drive any observed differences in temporal variability, we calculated site-specific total species  
158 richness, and the richness of each invasive status group from the observed and rarefied data,  
159 making extrapolations to account for incomplete sampling using Hill numbers ( $q = 0$ ) with the R  
160 package *iNEXT* (Hsieh et al., 2016).

161

### 162 *Temporal variability and time-series decomposition*

163 We calculated two aspects of temporal variability: functional and compositional (Supporting  
164 Information C). Functional variability refers to activity changes at the aggregate scale (e.g.,  
165 Hillebrand & Kunze, 2020) and is calculated as the coefficient of variability (ratio of the  
166 standard deviation to the mean) of total ant counts across all species per site (McArdle & Gaston,  
167 1995). Compositional variability estimates the variation in community composition over time  
168 and is calculated as temporal beta diversity (Legendre & De Cáceres, 2013) using the R package  
169 *adespatial* (Dray et al., 2022), which additionally records species' individual contributions to

170 beta diversity. As we use ant count data, compositional changes would thus represent changes in  
171 relative activity rates of different species in the local species pool, which in turn is a function of  
172 the abundance and patterns of behavior (Kaspari et al., 2022a).

173  
174 Next, we used temporal decomposition models to determine the relationships of temporal  
175 variability components with observed patterns. Time series can be decomposed into components  
176 describing different underlying temporal patterns in the data: “seasonal” processes that repeat  
177 cyclically over some temporal scale (i.e., phenology), “trend” that describes directional change,  
178 and “remainder” that represents any residual variation not captured by the other components (i.e.,  
179 short-term stochastic fluctuations; Hyndman & Athanasopoulos, 2021). A community with high  
180 temporal variability may have strong cyclical patterns, increasing or decreasing trends, high  
181 stochasticity, or some combination of these. For temporal datasets spanning many annual cycles,  
182 models that can estimate complex seasonal responses (e.g., wavelet analysis; Tonkin et al., 2017)  
183 are often employed, but for studies spanning few annual cycles at a fine temporal resolution,  
184 simpler models with fewer assumptions and problems with overfitting are preferable. We  
185 estimated additive temporal components for the ant activity data by fitting time-series linear  
186 models with temporal predictors using the R package *fable* (O’Hara-Wild et al., 2021). As our  
187 time-series was short, we used simple predictors consisting of a linear trend and a seasonal signal  
188 approximated with an annual Fourier term with the simplest maximum order ( $K$ ) of 1—this  
189 models seasonality as a sine wave (Hyndman & Athanasopoulos, 2021). We fitted this model to  
190 the rarefied data at both the site-level and species-level for land-cover groups, then decomposed  
191 the count value at each time-step. For each site, we measured the absolute variance of each  
192 temporal component, but also the relative component variance, defined here as the individual  
193 component variance divided by summed variance of all components (Supporting Information D).

194  
195 Finally, as spatial autocorrelation between sites did not affect results (Table S3; Supporting  
196 Information E), we used simple linear models to estimate relationships between land cover and  
197 our focal metrics of temporal variability. Specifically, we fitted models for total ant counts  
198 (before rarefaction), functional and compositional temporal variability, and absolute and relative  
199 variances of time-series components. To explore differences between native and alien species,  
200 we also fitted models separately by invasive status for site richness and summed species’  
201 contributions to beta diversity. We performed model selection on linear combinations of the  
202 predictor variables land-cover PC1 and PC2 using the Akaike Information Criterion corrected for  
203 small sample sizes (AICc).

204

#### 205 *Assessing effects of differences in temperature and community composition on observed* 206 *seasonality patterns*

207 To determine if other differences among sites may be responsible for any observed variation in  
208 ant community activity and relationships with land cover, we additionally examined differences  
209 in 1) regional and site-level temperature and 2) tested whether seasonality differences persisted  
210 after standardizing community composition between land-cover groups. For (1), we downloaded  
211 regional climate data for the collection period from the Japan Meteorological Agency (JMA)  
212 database ([http://www.jma.go.jp/en/amedas\\_h/map65.html](http://www.jma.go.jp/en/amedas_h/map65.html), accessed 04/01/2020) and calculated  
213 temperature means and extremes from the six climate stations that collect temperature data  
214 (Miyagijima, Itokazu, Naha, Ashimine, Nago, Oku). We also collected *in situ* site-level data

215 throughout the collection period at one station per site to characterize local air and soil  
216 temperature patterns (WatchDog 2900ET Weather Station 1.5 m above ground and SMEC  
217 WaterScout 300 Soil Sensor 10 cm below ground, Spectrum Technologies). With the same  
218 workflow as for the ant activity data, we calculated absolute variance of seasonality for regional  
219 and site-level temperature time-series, then estimated relationships with land-cover PC1 using  
220 linear models.

221  
222 For (2), we conducted analyses to test whether differences in community composition alone,  
223 without variation in seasonality within species, could be driving the observed patterns in  
224 seasonality, or alternatively if habitat-dependent dynamics of species occurring in both habitat  
225 types were responsible. We used land-cover PC1 to partition the sites into two groups with eight  
226 sites each—forested and developed (comprising sites with more agricultural and/or urban land  
227 cover)—and retained only those species shared between groups and with total counts greater  
228 than 100. We excluded the eight sites with intermediate values of PC1 to better represent the  
229 most characteristic sites for each land-cover group. To make balanced comparisons between  
230 land-cover groups, we rarefied each species' activity data to the minimum count of that species  
231 between groups (Fig. S1, Supporting Information B). To determine whether community  
232 composition affected our results, we fitted time-series linear models to each species in the land-  
233 cover groups and calculated the relative variance of their seasonality (forested versus developed  
234 sites). As differences between the land-cover groups were not normally distributed (Shapiro-  
235 Wilk test;  $p = 0.011$ ), we used the nonparametric Wilcoxon signed-rank test to determine  
236 whether the same species between groups exhibit significant differences in relative seasonality  
237 variance. Additionally, to determine how temporal mismatch changes with invasive status, we  
238 calculated the synchrony of seasonality for each invasive status between land-cover groups and  
239 standardized them to the same scale. We used the R package *codyn* (Hallett et al., 2016) to  
240 calculate synchrony using the method described by Loreau & De Mazancourt (2008). We then  
241 compared seasonal curves to the average seasonality curve for each land-cover group to visualize  
242 the degree of temporal mismatch by invasive status.

243

## 244 Results

245 Our sampling for 2016–2018 resulted in the recovery of >1.2 million individuals (before  
246 thresholding) and 16,595 unique count records at the site-level across 91 ant species. Total count  
247 was less than 5 individuals for 21 species and greater than 10,000 individuals for 15 species, with  
248 a minimum of 1 (*Aenictus ceylonicus*, *Crematogaster* c.f. *matsumurai*, *Ectomomyrmex* sp.,  
249 *Erromyrmica latinodis*, *Hypoponera* sp., *Leptogenys confucii*, *Strumigenys hirashimai*,  
250 *Strumigenys mazu*) and a maximum of 259,180 (*Tetramorium bicarinatum*). The pattern of ant  
251 activity dropping in the winter and rising in the summer qualitatively diminished as human  
252 disturbance increased (Fig. 2). Total ant activity (after thresholding to 500) had a nearly 23-fold  
253 difference between the site with the minimum count (Yona Forest,  $n = 3616$ ) and that with  
254 maximum count (Sueyoshi Forest,  $n = 82,781$ ). The natural log of total density had a strong  
255 negative relationship with land-cover PC1 ( $R^2 = 0.71$ ,  $p < 0.001$ ), indicating that ant activity  
256 overall was higher in developed areas than forested areas (Fig. 3). Rarefaction resampled all sites  
257 to the minimum site count before analysis.

258

259 The linear models suggested strong relationships with the land-cover PC1 for most metrics of  
260 temporal variability (Figs. 3, 4). Based on model selection via AICc, all models included PC1 as  
261 the sole predictor except the relative variances of seasonality and stochasticity, which also used  
262 PC2 (Table S3). Functional and compositional temporal variability both had strong positive  
263 relationships with PC1 (functional:  $R^2 = 0.67$ ,  $p < 0.001$ ; compositional:  $R^2 = 0.60$ ,  $p < 0.001$ ;  
264 Fig. 3), and these two variabilities also had a strong relationship to each other ( $R^2 = 0.62$ , Fig.  
265 S3). The species' contributions to beta diversity (Fig. S4) that explained individual species'  
266 impacts on compositional variability were also positively correlated with PC1 for native species  
267 ( $R^2 = 0.40$ ,  $p < 0.001$ ), but uncertain ( $R^2 = 0.28$ ,  $p < 0.01$ ) species had a weaker, negative  
268 relationship (alien species showed no relationship). Absolute seasonality and stochasticity  
269 variance had positive relationships with PC1, though that for seasonality ( $R^2 = 0.57$ ,  $p < 0.001$ )  
270 was stronger than that for stochasticity ( $R^2 = 0.15$ ,  $p < 0.05$ ; Fig. 4). On the other hand, relative  
271 seasonality variance ( $R^2 = 0.23$ ,  $p < 0.05$ ) was positively related to PC1, while relative  
272 stochasticity variance ( $R^2 = 0.36$ ,  $p < 0.01$ ) had a negative relationship (both had  $p > 0.05$  for  
273 PC2; Fig. 4). All linear regression results are found in Table S3.

274  
275 We found no evidence that differences in species richness, temperature at different scales, or  
276 species composition are candidates as drivers of observed differences in ant community temporal  
277 variability. We found no relationship between PC1 and total species richness (either observed or  
278 extrapolated), and a weak correlation with rarefied richness ( $R^2 = 0.15$ ,  $p < 0.05$ ) due to the loss  
279 of rare species during the rarefaction process, though we consider this unlikely to bias our results  
280 (Fig. S5). We did find strong positive relationships with PC1 for native richness values  
281 (observed:  $R^2 = 0.47$ ,  $p < 0.001$ ; extrapolated:  $R^2 = 0.35$ ,  $p < 0.005$ ; rarefied:  $R^2 = 0.61$ ,  $p <$   
282  $0.001$ ) indicating that more native species can be found in the more forested sites, and weaker  
283 negative relationships with alien richness values (observed:  $R^2 = 0.29$ ,  $p < 0.005$ ; extrapolated:  
284  $R^2 = 0.20$ ,  $p < 0.05$ ; rarefied:  $R^2 = 0.20$ ,  $p < 0.05$ ) (Table S3, Fig. S5). Moreover, we found no  
285 clear patterns in the absolute variance of regional temperature seasonality from JMA climate  
286 stations spanning the island from north to south, nor did we find relationships between the  
287 absolute seasonality variance of *in situ* air or soil temperature and PC1 (Fig. S6). Only two sites  
288 had exposed sensors that were not located below canopy cover (Oyama Park and OIST Open  
289 [OYA and OIT, respectively, in Fig. S6]), and these had higher absolute variances than the other  
290 sites. Concerning the tests of different threshold sizes, although we observed some differences,  
291 our results remained similar (Supporting Information F, Fig. S7).

292  
293 Lastly, individual species showed differing seasonality between land-cover groups (more  
294 forested and more developed). Comparisons revealed that, in general, the same species have a  
295 higher relative seasonality variance at forested sites than at sites with more human development  
296 ( $p < 0.005$ ), though the alien species *Tetramorium lanuginosum* was a notable exception (*Tlanu*  
297 in Fig. 5). While seasonality was stronger in the forested group for all species, when separated by  
298 invasive status we observed higher synchrony in the forested group for native ( $n = 11$ , forested:  
299  $0.75$ , developed:  $0.58$ ) and uncertain species ( $n = 8$ , forested:  $0.5$ , developed:  $0.28$ ), but the  
300 opposite pattern for alien species ( $n = 4$ , forested:  $0.73$ , developed:  $0.86$ ) (Fig. 5).

301



## 302 Discussion

303 Our study sheds light on how ant community activity dynamics vary across a gradient of human-  
304 induced land-cover change in a subtropical island environment. Our results complement an  
305 extensive number of recent studies focusing on the temperate zone that examine change of insect  
306 populations over time (Hallmann et al., 2017; Kaspari et al., 2022a; Seibold et al., 2019; Uhler et  
307 al., 2021), including those with enough intra-annual sampling to examine changes to seasonality  
308 (Kaspari et al., 2022b). The notable difference is that because climatic seasonality is much  
309 weaker in the subtropics, differences in seasonality of insect populations across environmental  
310 gradients are likely to be more difficult to detect than for populations in the temperate zone that  
311 experience stronger seasonal contrasts (Kishimoto-Yamada & Itioka, 2015).

312  
313 We found that temporal variability diminishes for the subtropical ant communities of Okinawa  
314 Island as land cover transitions from forested to more developed, and that this is related to a  
315 breakdown in seasonality. Forested sites were more variable overall, but their resident ant  
316 communities were more seasonal and synchronous, while community variability for developed  
317 sites (i.e., urban and agricultural) was characterized by stochastic variation. Although native ant  
318 richness was higher in forested sites, we determined the observed differences in seasonality  
319 across the land-cover gradient were not due to differences in regional or local temperature  
320 patterns, nor to species composition among sites. Compositional differences between  
321 communities in different land-cover types, such as the prevalence of one or more highly seasonal  
322 species, could drive observed relationships between community seasonality and land cover.  
323 However, we found that populations of the same species occupying forested sites were more  
324 seasonal than those with more human development. Further, when we separated species by  
325 invasive status, we found that the strong seasonal patterns we observed in the forest were more  
326 synchronous for native than alien species, though both synchrony values are reasonably high and  
327 the considerably smaller sample size for alien species should be taken into consideration.

328  
329 Our results suggest that increasing agricultural and urban development can dampen seasonal  
330 community variability and thus disrupt phenological patterns for insects. In a number of studies,  
331 loss of seasonality has been explained by biotic homogenization, whereby communities become  
332 more similar and generalist, and this has been linked with urbanization for a variety of taxa,  
333 including bees (Hung et al., 2017), bugs and leafhoppers (Knop, 2016), flowering plants and  
334 butterflies (Uchida et al., 2018), and birds (La Sorte et al., 2014; Leveau, 2018). However, the  
335 majority of studies on the temporal variability of natural communities compare measurements  
336 between years and rarely within them (e.g., Cottingham et al., 2001; de Mazancourt et al., 2013;  
337 Olivier et al., 2020; Tilman et al., 2006), meaning that loss of seasonality due to environmental  
338 or anthropogenic factors may be overlooked. Yearly samples taken for highly seasonal  
339 communities at peak productivity over many annual cycles should show higher stability than for  
340 a more stochastic community, yet more frequent sampling would reveal considerable variation  
341 due to higher synchrony and seasonality. As other studies have demonstrated, temporal scale is a  
342 crucial factor that determines how stability should be interpreted (Clark et al., 2021; McArdle et  
343 al., 1990), and as community variability and its drivers vary across temporal scales (Hatosy et al.,  
344 2013), it is important to measure community responses to the environment and anthropogenic  
345 disturbance across scales to improve future predictions.

346

347 We found a positive relationship between functional and compositional temporal variability,  
348 meaning that those sites with communities that varied more as a whole tended also to have  
349 higher total variation of the individual species in the local pool. The relationship between  
350 functional and compositional variability can range from positive to negative depending on the  
351 system and exposure to disturbance (Hillebrand et al., 2018; Ross et al., 2022; White et al.,  
352 2020). Two characteristics of more forested sites may help explain this positive relationship. The  
353 first is that more forested sites had higher variability in general at the biweekly timescale. The  
354 second is that, at more forested sites, native species had higher richness and the highest  
355 contributions to beta diversity. Sites with high richness that include substantial numbers of alien  
356 species can have community dynamics that differ considerably from similar sites in which native  
357 species dominate (Krushelnycky & Gillespie, 2008; Sanders et al., 2003), thus including alien  
358 species in richness estimates can affect how diversity-stability relationships are interpreted (e.g.,  
359 Moore & Olden, 2017).

360  
361 Our results raise the question of what mechanisms drive these patterns. We outline several  
362 hypotheses for why seasonal variation in activity could vary across the land-cover gradient. First,  
363 there is a possibility that ants are simply responding to the temperature they experience on a  
364 physiological level, reflecting temperature and microclimatic variation across habitats. Ants are  
365 well-known to be sensitive to temperature variation, with foraging limited to certain temperature  
366 ranges (Bernstein 1979, Stuble et al., 2013). Regional climatic variation across the island is very  
367 modest, and with no consistent differences in seasonality. Further, we found no relationships  
368 between the seasonal variance of *in situ* air and soil temperature and the main land-cover  
369 gradient PC1. However, differences in canopy openness, vegetation, and urbanization (via heat-  
370 island effects, etc.) may create conditions that are relevant for promoting and depressing ant  
371 foraging, and the prevalence of such conditions might be higher in more degraded habitats.  
372 Comprehensive measurements with small sensors at various habitat strata for representative sites  
373 could help elucidate whether this phenomenon could differ across land-cover types. Another  
374 possibility is that ants are responding to resource availability patterns. In this scenario, it is  
375 possible that resources are more seasonal inside the forest rather than more human-impacted  
376 areas. This could occur, for example, because of anthropogenic food sources that are more static  
377 throughout the year, or because of differences in phenology of vegetation inside or outside the  
378 forest (Penick et al., 2015). A related question is whether these differences in seasonality are  
379 limited to ants or are observed across the arthropod community. Were arthropod seasonality  
380 responding more generally to land cover, this would provide a resource pattern that could affect  
381 ant activity. Related to this, it is unclear why there seems to be little seasonal niche  
382 differentiation for ant species in forested areas, which have activity patterns that follow  
383 temperature quite closely in synchrony. One possibility is that species become most active at  
384 different times during the same warm season to avoid competition—we saw some evidence of  
385 this in the standardized seasonal curves (Fig. 5). This could be due to the inability to achieve  
386 high activity levels during cooler months due to physiological limitations, which may be absent  
387 in more developed environments with anthropogenic temperature refugia. Other potential  
388 explanations relating to differences in the ecology or physical environments across the two  
389 habitats likely exist, but more targeted research is needed to address this question.

390  
391 We measured variability over two years, but there may be other types of variability that only  
392 manifest on longer timescales and are also correlated with land cover. For example, introduced

393 ants are known to have boom-bust dynamics when they reach new localities (Lester & Gruber,  
394 2016). Over longer timescales, communities in more human-dominated areas may prove to be  
395 more dynamic with successive shifts in the community. Indeed, we witnessed such an event in  
396 our two-year period at one of our sites (Sefautaki Forest), where *Pheidole megacephala*, a  
397 notoriously impactful invasive ant, arrived and quickly reached high abundance, raising  
398 variability of this site beyond what was typical of others with similar land-cover characteristics.  
399 Recent research in Yambaru Forest has documented resilience of native ant communities to  
400 disturbance based on surveys of invasions at developed areas after regrowth (Shimoji et al.,  
401 2022), so this site too may eventually recover to its previous structure. Thus, successive regime  
402 shifts in these more disturbed communities could occur over longer timescales, but only  
403 monitoring over more years would reveal such dynamics.  
404

## 405 Conclusions

406 This study provides novel insight into the seasonal dynamics of subtropical insect communities  
407 across differing levels of human development. Importantly, it is the first study to our knowledge  
408 to measure seasonality of ant activity with high-frequency sampling across a human disturbance  
409 gradient. The results of our study, which link anthropogenic disturbance in the form of  
410 agricultural and urban development to a reduction in intra-annual temporal variability due to  
411 weakening seasonality, support the growing evidence that human development reduces natural  
412 seasonal patterns (Hung et al., 2017; La Sorte et al., 2014; Leveau, 2018; Uchida et al., 2018).  
413 Although this study focuses on correlative relationships and thus cannot fundamentally  
414 demonstrate causal mechanisms, it does provide compelling evidence that continuing habitat loss  
415 and fragmentation can lead to increasing homogenization of insect communities in parts of the  
416 globe with the highest insect diversity, the subtropics and tropics. As loss of seasonal patterns  
417 has been linked to a subsequent reduction in key ecosystem functions and services (Ross et al.,  
418 2021; Stevenson et al., 2015), increasing development could result in disruptions to nutrient  
419 cycling and food security (Bommarco et al., 2013). To better understand the generality of these  
420 patterns, future studies using high-frequency sampling should focus on monitoring a greater  
421 diversity of insect communities across different habitat strata (i.e., arboreal, subterranean; Gotelli  
422 et al., 2011) in a variety of biomes. Greater focus on the impacts of land-cover change on insect  
423 community seasonality should aid ongoing management and conservation efforts to help  
424 preserve the important ecosystem functions and services insects provide.  
425

## 426 Data Availability

427 Raw species' count data before processing and R code used for analysis will be found on Data  
428 Dryad after article acceptance. Please contact <jamie.m.kass (at) gmail.com> with data requests.

429

## 430 Acknowledgments

431 First and foremost, we would like to thank Takuma Yoshida and the OKEON Churamori Project  
432 Field Team for collecting, managing, and identifying the ant specimens: Linda Emiko Iha,  
433 Ayumi Inoguchi, Shinji Iriyama, Toshihiro Kinjo, Yoko Kudaka, Masafumi Kuniyshi, Izumi  
434 Maehira, Akino Miyagi, Seiichiro Nakagawa, Madoka Oguro, Shoko Suzuki, Yasutaka Tamaki,

435 Takumi Uchima, and Kozue Uekama. We would also like to thank Samuel R.P.J. Ross and  
436 Nicholas R. Friedman for comments on earlier versions of the manuscript, and also Chisa Oshiro  
437 for administrative support. JMK was supported by the Japan Society for the Promotion of  
438 Science (JSPS) Postdoctoral Fellowships for Foreign Researchers Program. ID was supported by  
439 a JSPS Invitational Fellowship.  
440

441 References

- 442  
443 Andersen, A. N., & Majer, J. D. (2004). Ants show the way Down Under: Invertebrates as  
444 bioindicators in land management. *Frontiers in Ecology and the Environment*, 2(6), 291–  
445 298.
- 446 Basu, P. (1997). Seasonal and Spatial Patterns in Ground Foraging Ants in a Rain Forest in the  
447 Western Ghats, India. *Biotropica*, 29(4), 489–500.
- 448 Bernstein, R. A. (1979). Schedules of foraging activity in species of ants. *Journal of Animal*  
449 *Ecology*, 921–930.
- 450 Bommarco, R., Kleijn, D., & Potts, S. G. (2013). Ecological intensification: Harnessing  
451 ecosystem services for food security. *Trends in Ecology & Evolution*, 28(4), 230–238.
- 452 Cardinale, B. J., Duffy, J. E., Gonzalez, A., Hooper, D. U., Perrings, C., Venail, P., Narwani, A.,  
453 Mace, G. M., Tilman, D., Wardle, D. A., Kinzig, A. P., Daily, G. C., Loreau, M., Grace,  
454 J. B., Larigauderie, A., Srivastava, D. S., & Naeem, S. (2012). Biodiversity loss and its  
455 impact on humanity. *Nature*, 486(7401), 59–67.
- 456 Castro, D. M. P. de, Dolédec, S., & Callisto, M. (2018). Land cover disturbance homogenizes  
457 aquatic insect functional structure in neotropical savanna streams. *Ecological Indicators*,  
458 84, 573–582.
- 459 Clark, A. T., Arnoldi, J., Zelnik, Y. R., Barabas, G., Hodapp, D., Karakoç, C., König, S.,  
460 Radchuk, V., Donohue, I., Huth, A., Jacquet, C., Mazancourt, C., Mentges, A., Nothaaß,  
461 D., Shoemaker, L. G., Taubert, F., Wiegand, T., Wang, S., Chase, J. M., ... Harpole, S.  
462 (2021). General statistical scaling laws for stability in ecological systems. *Ecology*  
463 *Letters*, 24(7), 1474–1486.
- 464 Corro, E. J., Ahuatzin, D. A., Jaimes, A. A., Favila, M. E., Ribeiro, M. C., López-Acosta, J. C.,  
465 & Dáttilo, W. (2019). Forest cover and landscape heterogeneity shape ant–plant co-  
466 occurrence networks in human-dominated tropical rainforests. *Landscape Ecology*, 34(1),  
467 93–104.
- 468 Cottingham, K. L., Brown, B. L., & Lennon, J. T. (2001). Biodiversity may regulate the temporal  
469 variability of ecological systems. *Ecology Letters*, 4(1), 72–85.
- 470 de Mazancourt, C., Isbell, F., Larocque, A., Berendse, F., De Luca, E., Grace, J. B., Haegeman,  
471 B., Wayne Polley, H., Roscher, C., Schmid, B., Tilman, D., van Ruijven, J., Weigelt, A.,  
472 Wilsey, B. J., & Loreau, M. (2013). Predicting ecosystem stability from community  
473 composition and biodiversity. *Ecology Letters*, 16(5), 617–625.
- 474 Dornelas, M., Magurran, A. E., Buckland, S. T., Chao, A., Chazdon, R. L., Colwell, R. K.,  
475 Curtis, T., Gaston, K. J., Gotelli, N. J., Kosnik, M. A., McGill, B., McCune, J. L.,  
476 Morlon, H., Mumby, P. J., Øvreås, L., Stuedeny, A., & Vellend, M. (2013). Quantifying  
477 temporal change in biodiversity: Challenges and opportunities. *Proceedings of the Royal*  
478 *Society B: Biological Sciences*, 280(1750), 20121931.
- 479 Dray, S., Bauman, D., Blanchet, G., Borcard, D., Clappe, S., Guenard, G., Thibaut, J., Larocque,  
480 G., Legendre, P., Madi, N., & Wagner, H. H. (2022). *adespatial: Multivariate Multiscale*  
481 *Spatial Analysis* (0.3-16). <https://CRAN.R-project.org/package=adespatial>
- 482 Gaston, K. J., & McArdle, B. H. (1994). The temporal variability of animal abundances:  
483 Measures, methods and patterns. *Philosophical Transactions of the Royal Society B*,  
484 345(1314), 335–358.

- 485 Gotelli, N. J., Ellison, A. M., Dunn, R. R., & Sanders, N. J. (2011). Counting ants (Hymenoptera:  
486 Formicidae): Biodiversity sampling and statistical analysis for myrmecologists.  
487 *Myrmecological News*, 32.
- 488 Goulson, D. (2019). The insect apocalypse, and why it matters. *Current Biology*, 29(19), R967–  
489 R971.
- 490 Guénard, B., Weiser, M. D., Gomez, K., Narula, N., & Economo, E. P. (2017). The Global Ant  
491 Biodiversity Informatics (GABI) database: synthesizing data on the geographic  
492 distribution of ant species (Hymenoptera: Formicidae). *Myrmecological  
493 News/Osterreichische Gesellschaft für Entomofaunistik*, 24, 83-89.
- 494 Hallett, L. M., Jones, S. K., MacDonald, A. A. M., Jones, M. B., Flynn, D. F. B., Ripplinger, J.,  
495 Slaughter, P., Gries, C., & Collins, S. L. (2016). codyn: An r package of community  
496 dynamics metrics. *Methods in Ecology and Evolution*, 7(10), 1146–1151.
- 497 Hallmann, C. A., Sorg, M., Jongejans, E., Siepel, H., Hofland, N., Schwan, H., Stenmans, W.,  
498 Müller, A., Sumser, H., Hörrén, T., Goulson, D., & Kroon, H. de. (2017). More than 75  
499 percent decline over 27 years in total flying insect biomass in protected areas. *PLOS  
500 ONE*, 12(10), e0185809.
- 501 Hatosy, S. M., Martiny, J. B. H., Sachdeva, R., Steele, J., Fuhrman, J. A., & Martiny, A. C.  
502 (2013). Beta diversity of marine bacteria depends on temporal scale. *Ecology*, 94(9),  
503 1898–1904.
- 504 Hijmans, R. J. (2021). *raster: Geographic Data Analysis and Modeling* (3.4-13) [R].  
505 <https://CRAN.R-project.org/package=raster>
- 506 Hillebrand, H., & Kunze, C. (2020). Meta-analysis on pulse disturbances reveals differences in  
507 functional and compositional recovery across ecosystems. *Ecology Letters*, 23(3), 575–  
508 585.
- 509 Hillebrand, H., Langenheder, S., Lebet, K., Lindström, E., Östman, Ö., & Striebel, M. (2018).  
510 Decomposing multiple dimensions of stability in global change experiments. *Ecology  
511 Letters*, 21(1), 21–30.
- 512 Hölldobler, B., & Wilson, E. (1990). *The Ants*. Harvard University Press.
- 513 Hsieh, T. C., Ma, K. H., & Chao, A. (2016). iNEXT: An R package for rarefaction and  
514 extrapolation of species diversity (Hill numbers). *Methods in Ecology and Evolution*,  
515 7(12), 1451–1456.
- 516 Hung, K.-L. J., Ascher, J. S., & Holway, D. A. (2017). Urbanization-induced habitat  
517 fragmentation erodes multiple components of temporal diversity in a Southern California  
518 native bee assemblage. *PLOS ONE*, 12(8), e0184136.
- 519 Hyndman, R. J., & Athanasopoulos, G. (2021). *Forecasting: Principles and practice* (3rd ed.).  
520 OTexts: Melbourne, Australia. <https://OTexts.com/fpp3>
- 521 Janicki, J., Narula, N., Ziegler, M., Guénard, B., & Economo, E. P. (2016). Visualizing and  
522 interacting with large-volume biodiversity data using client–server web-mapping  
523 applications: The design and implementation of antmaps. org. *Ecological Informatics*, 32,  
524 185-193.
- 525 Janzen, D. H., & Hallwachs, W. (2021). To us insectometers, it is clear that insect decline in our  
526 Costa Rican tropics is real, so let’s be kind to the survivors. *Proceedings of the National  
527 Academy of Sciences*, 118(2), e2002546117.
- 528 Kaspari, M., Weiser, M. D., Marshall, K. E., Miller, M., Siler, C., & de Beurs, K. (2022a).  
529 Activity density at a continental scale: What drives invertebrate biomass moving across  
530 the soil surface? *Ecology*, 103(1), e03542.

- 531 Kaspari, M., Weiser, M. D., Marshall, K. E., Siler, C. D., & de Beurs, K. (2022b). Temperature–  
532 habitat interactions constrain seasonal activity in a continental array of pitfall traps.  
533 *Ecology*, e3855.
- 534 Katayama, M., & Tsuji, K. (2010). Habitat differences and occurrence of native and exotic ants  
535 on Okinawa Island. *Entomological Science*, 13(4), 425–429.
- 536 Kishimoto-Yamada, K., & Itioka, T. (2015). How much have we learned about seasonality in  
537 tropical insect abundance since Wolda (1988)? *Entomological Science*, 18(4), 407–419.
- 538 Knop, E. (2016). Biotic homogenization of three insect groups due to urbanization. *Global*  
539 *Change Biology*, 22(1), 228–236.
- 540 Krushelnycky, P. D., & Gillespie, R. G. (2008). Compositional and functional stability of  
541 arthropod communities in the face of ant invasions. *Ecological Applications*, 18(6),  
542 1547–1562.
- 543 La Sorte, F. A., Tingley, M. W., & Hurlbert, A. H. (2014). The role of urban and agricultural  
544 areas during avian migration: An assessment of within-year temporal turnover. *Global*  
545 *Ecology and Biogeography*, 23(11), 1225–1234.
- 546 Legendre, P., & De Cáceres, M. (2013). Beta diversity as the variance of community data:  
547 Dissimilarity coefficients and partitioning. *Ecology Letters*, 16(8), 951–963.
- 548 Lester, P. J., & Gruber, M. A. M. (2016). Booms, busts and population collapses in invasive ants.  
549 *Biological Invasions*, 18(11), 3091–3101.
- 550 Leveau, L. M. (2018). Urbanization, environmental stabilization and temporal persistence of bird  
551 species: A view from Latin America. *PeerJ*, 2018(12), e6056.
- 552 Loreau, M., & de Mazancourt, C. (2008). Species Synchrony and Its Drivers: Neutral and  
553 Nonneutral Community Dynamics in Fluctuating Environments. *The American*  
554 *Naturalist*, 172(2), E48–E66.
- 555 McArdle, B. H., & Gaston, K. J. (1995). The Temporal Variability of Densities: Back to Basics.  
556 *Oikos*, 74(1), 165–171.
- 557 McArdle, B. H., Gaston, K. J., & Lawton, J. H. (1990). Variation in the Size of Animal  
558 Populations: Patterns, Problems and Artefacts. *The Journal of Animal Ecology*, 59(2),  
559 439.
- 560 McKinney, M. L. (2006). Urbanization as a major cause of biotic homogenization. *Biological*  
561 *Conservation*, 127(3), 247–260.
- 562 Moore, J. W., & Olden, J. D. (2017). Response diversity, nonnative species, and disassembly  
563 rules buffer freshwater ecosystem processes from anthropogenic change. *Global Change*  
564 *Biology*, 23(5), 1871–1880.
- 565 O’Hara-Wild, M., Hyndman, R., & Wang, E. (2021). *fable: Forecasting Models for Tidy Time*  
566 *Series* (0.3.1). <https://CRAN.R-project.org/package=fable>
- 567 Oliver, I., Dorrough, J., Doherty, H., & Andrew, N. R. (2016). Additive and synergistic effects of  
568 land cover, land use and climate on insect biodiversity. *Landscape Ecology*, 31(10),  
569 2415–2431.
- 570 Olivier, T., Thébault, E., Elias, M., Fontaine, B., & Fontaine, C. (2020). Urbanization and  
571 agricultural intensification destabilize animal communities differently than diversity loss.  
572 *Nature Communications*, 11(1), 1–9.
- 573 Pebesma, E. (2018). Simple Features for R: Standardized Support for Spatial Vector Data. *The R*  
574 *Journal*, 10(1), 439–446.

- 575 Penick, C. A., Savage, A. M., & Dunn, R. R. (2015). Stable isotopes reveal links between human  
576 food inputs and urban ant diets. *Proceedings of the Royal Society B: Biological Sciences*,  
577 282(1806), 20142608.
- 578 Ross, S. R. P.-J., Arnoldi, J.-F., Loreau, M., White, C. D., Stout, J. C., Jackson, A. L., &  
579 Donohue, I. (2021). Universal scaling of robustness of ecosystem services to species loss.  
580 *Nature Communications*, 12(1), 1–7.
- 581 Ross, S. R. P.-J., Friedman, N. R., Dudley, K. L., Yoshimura, M., Yoshida, T., & Economo, E. P.  
582 (2018). Listening to ecosystems: Data-rich acoustic monitoring through landscape-scale  
583 sensor networks. *Ecological Research*, 33(1), 135–147.
- 584 Ross, S. R. P.-J., García Molinos, J., Okuda, A., Johnstone, J., Atsumi, K., Futamura, R.,  
585 Williams, M. A., Matsuoka, Y., Uchida, J., Kumikawa, S., Sugiyama, H., Kishida, O., &  
586 Donohue, I. (2022). Predators mitigate the destabilising effects of heatwaves on  
587 multitrophic stream communities. *Global Change Biology*, 28(2), 403–416.
- 588 Russell, J. C., & Kueffer, C. (2019). Island Biodiversity in the Anthropocene. *Annual Review of*  
589 *Environment and Resources*, 44(1), 31–60.
- 590 Samways, M. J. (1990). Species temporal variability: Epigaeic ant assemblages and management  
591 for abundance and scarcity. *Oecologia*, 84(4), 482–490.
- 592 Sanders, N. J., Gotelli, N. J., Heller, N. E., & Gordon, D. M. (2003). Community disassembly by  
593 an invasive species. *Proceedings of the National Academy of Sciences*, 100(5), 2474–  
594 2477.
- 595 Schowalter, T. D. (2013). *Insects and Sustainability of Ecosystem Services*. CRC Press.
- 596 Seibold, S., Gossner, M. M., Simons, N. K., Blüthgen, N., Müller, J., Ambarlı, D., Ammer, C.,  
597 Bauhus, J., Fischer, M., Habel, J. C., Linsenmair, K. E., Nauss, T., Penone, C., Prati, D.,  
598 Schall, P., Schulze, E.-D., Vogt, J., Wöllauer, S., & Weisser, W. W. (2019). Arthropod  
599 decline in grasslands and forests is associated with landscape-level drivers. *Nature*,  
600 574(7780), 671–674.
- 601 Senapathi, D., Carvalheiro, L. G., Biesmeijer, J. C., Dodson, C.-A., Evans, R. L., McKerchar,  
602 M., Morton, R. D., Moss, E. D., Roberts, S. P. M., Kunin, W. E., & Potts, S. G. (2015).  
603 The impact of over 80 years of land cover changes on bee and wasp pollinator  
604 communities in England. *Proceedings of the Royal Society B: Biological Sciences*,  
605 282(1806), 20150294.
- 606 Shimoji, H., Suwabe, M., Kikuchi, T., Ohnishi, H., Tanaka, H., Kawara, K., Hidaka, Y., Enoki,  
607 T., & Tsuji, K. (2022). Resilience of native ant community against invasion of exotic ants  
608 after anthropogenic disturbances of forest habitats. *Ecology and Evolution*, 12(7), e9073.
- 609 Simberloff, D., & Gibbons, L. (2004). Now you see them, now you don't! – Population Crashes  
610 of Established Introduced Species. *Biological Invasions*, 6(2), 161–172.
- 611 Stevenson, T. J., Visser, M. E., Arnold, W., Barrett, P., Biello, S., Dawson, A., Denlinger, D. L.,  
612 Dominoni, D., Ebling, F. J., Elton, S., Evans, N., Ferguson, H. M., Foster, R. G., Hau,  
613 M., Haydon, D. T., Hazlerigg, D. G., Heideman, P., Hopcraft, J. G. C., Jonsson, N. N., ...  
614 Helm, B. (2015). Disrupted seasonal biology impacts health, food security and  
615 ecosystems. *Proceedings of the Royal Society B: Biological Sciences*, 282(1817),  
616 20151453.
- 617 Stuble, K. L., Pelini, S. L., Diamond, S. E., Fowler, D. A., Dunn, R. R., & Sanders, N. J. (2013).  
618 Foraging by forest ants under experimental climatic warming: a test at two sites. *Ecology*  
619 *and Evolution*, 3(3), 482–491.



- 620 Suwabe, M., Ohnishi, H., Kikuchi, T., Kawara, K., & Tsuji, K. (2009). Difference in seasonal  
621 activity pattern between non-native and native ants in subtropical forest of Okinawa  
622 Island, Japan. *Ecological Research*, 24(3), 637–643.
- 623 Terayama, M., Takamine, H., & Kubota, S. (2009) *Ants in Okinawa*. 182 pp. Hidetsune  
624 Takamine, Naha City.
- 625 Terayama, M., Kubota, S., & Eguchi, K. (2014) *Encyclopedia of Japanese ants*. 278 pp. Asakura  
626 Shoten, Tokyo.
- 627 Tilman, D., Reich, P. B., & Knops, J. M. H. (2006). Biodiversity and ecosystem stability in a  
628 decade-long grassland experiment. *Nature*, 441(7093), 629–632.
- 629 Tonkin, J. D., Bogan, M. T., Bonada, N., Rios-Touma, B., & Lytle, D. A. (2017). Seasonality  
630 and predictability shape temporal species diversity. *Ecology*, 98(5), 1201–1216.
- 631 Uchida, K., Fujimoto, H., & Ushimaru, A. (2018). Urbanization promotes the loss of seasonal  
632 dynamics in the semi-natural grasslands of an East Asian megacity. *Basic and Applied  
633 Ecology*, 29, 1–11.
- 634 Uhler, J., Redlich, S., Zhang, J., Hothorn, T., Tobisch, C., Ewald, J., Thorn, S., Seibold, S.,  
635 Mitesser, O., Morinière, J., Bozicevic, V., Benjamin, C. S., Englmeier, J., Fricke, U.,  
636 Ganuza, C., Haensel, M., Riebl, R., Rojas-Botero, S., Rummler, T., ... Müller, J. (2021).  
637 Relationship of insect biomass and richness with land use along a climate gradient.  
638 *Nature Communications*, 12(1), 1–9.
- 639 Van Buskirk, J. (2005). Local and Landscape Influence on Amphibian Occurrence and  
640 Abundance. *Ecology*, 86(7), 1936–1947.
- 641 Wagner, D. L. (2020). Insect Declines in the Anthropocene. *Annual Review of Entomology*,  
642 65(1), 457–480.
- 643 White, L., O'Connor, N. E., Yang, Q., Emmerson, M. C., & Donohue, I. (2020). Individual  
644 species provide multifaceted contributions to the stability of ecosystems. *Nature Ecology  
645 & Evolution*, 4(12), 1594–1601.
- 646 Yamauchi, K., & Ogata, K. (1995). Social structure and reproductive systems of tramp versus  
647 endemic ants (Hymenoptera: Formicidae) of the Ryukyu Islands. *Pacific Science*, 49, 55–  
648 68.
- 649  
650

651

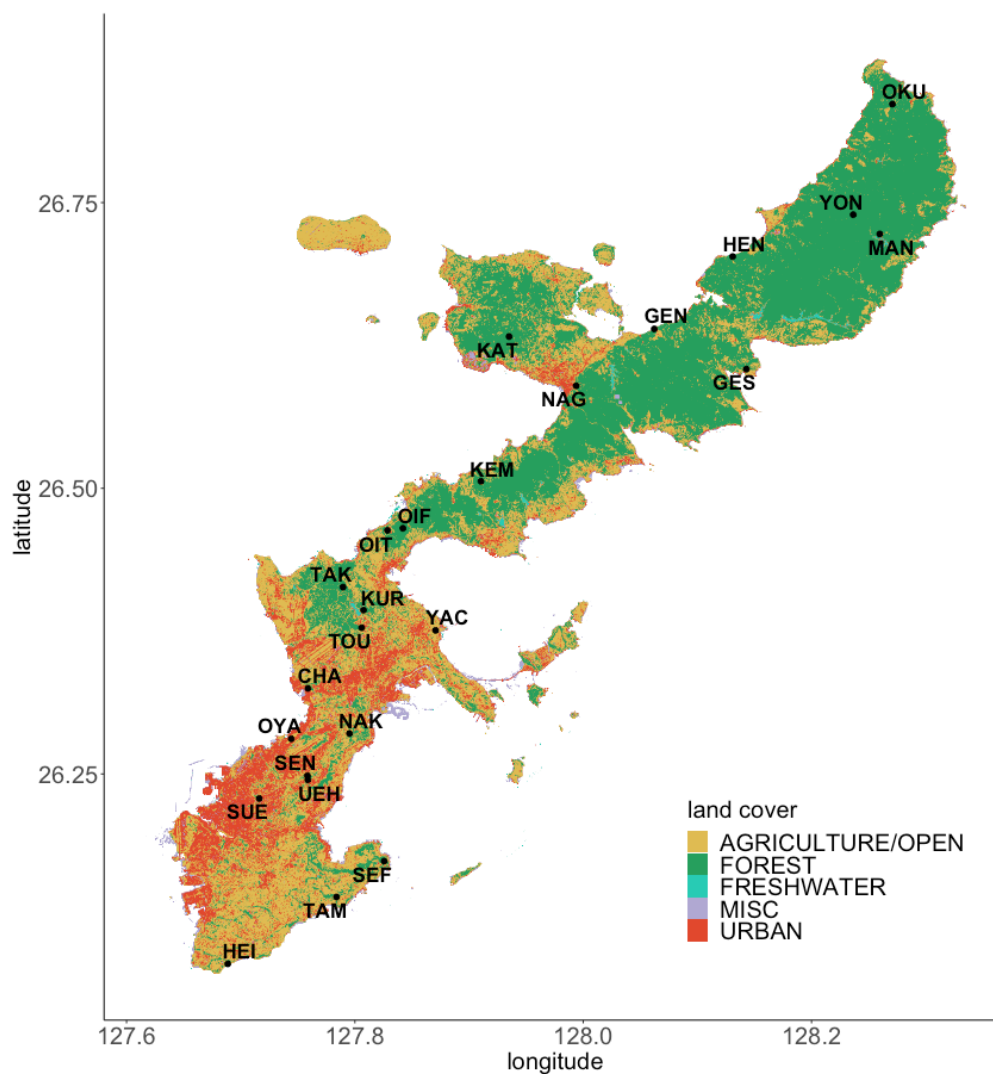

652

653 Figure 1. Major land-cover classes of Okinawa Island with locations of the OKEON  
654 monitoring stations, which cover the full gradient of human development across the  
655 island. Ants were sampled from three stations at each sampling site biweekly from 2016–  
656 2018 (total of 52 sampling periods).

657

658

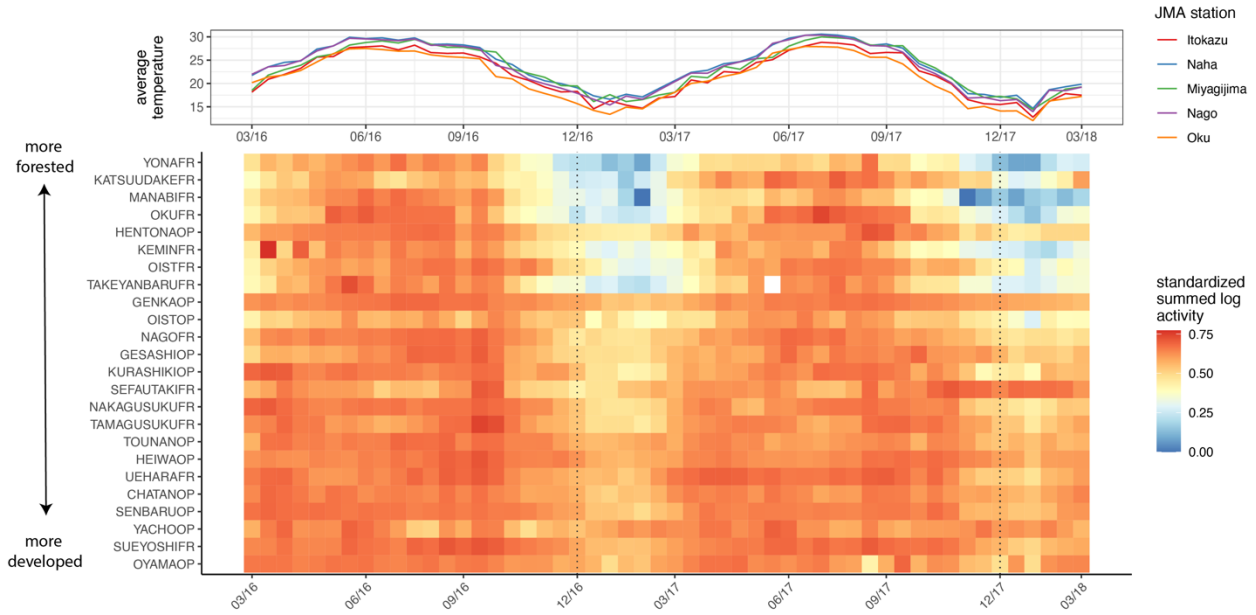

659

660 Figure 2. Heat map showing the standardized ant activity (i.e., logs of summed site counts  
661 divided by the log of the grand total count) over two years in Okinawa. Mean temperature  
662 measurements from the Japan Meteorological Agency across the island, ordered from south to  
663 north, are included for reference. Heat map sites are ordered by values of land-cover PC1,  
664 explaining the anthropogenic stress gradient (top: more forested, bottom: more urban). Dotted  
665 lines show the last sampling period before the new year.

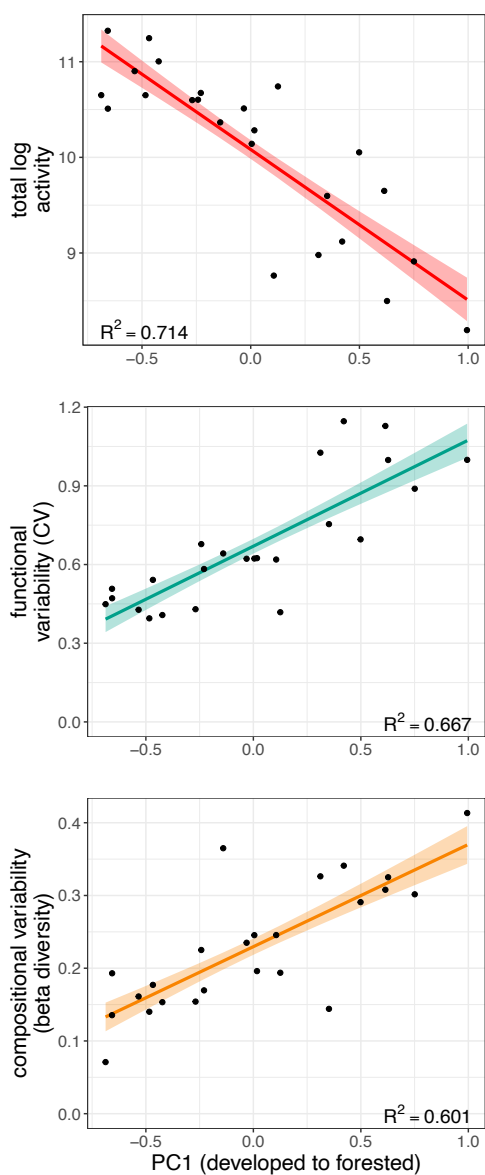

666  
667

668 Figure 3. Trends in total log activity, functional variability, and compositional variability for ants  
669 across a gradient of anthropogenic impact. Relationships with PC1, explaining the anthropogenic  
670 stress gradient (low: more developed, high: more forested). Total log ant activity (before  
671 rarefaction) correlates negatively with PC1 while indices of temporal variability (functional:  
672 coefficient of variation, compositional: beta diversity) correlate positively.

673

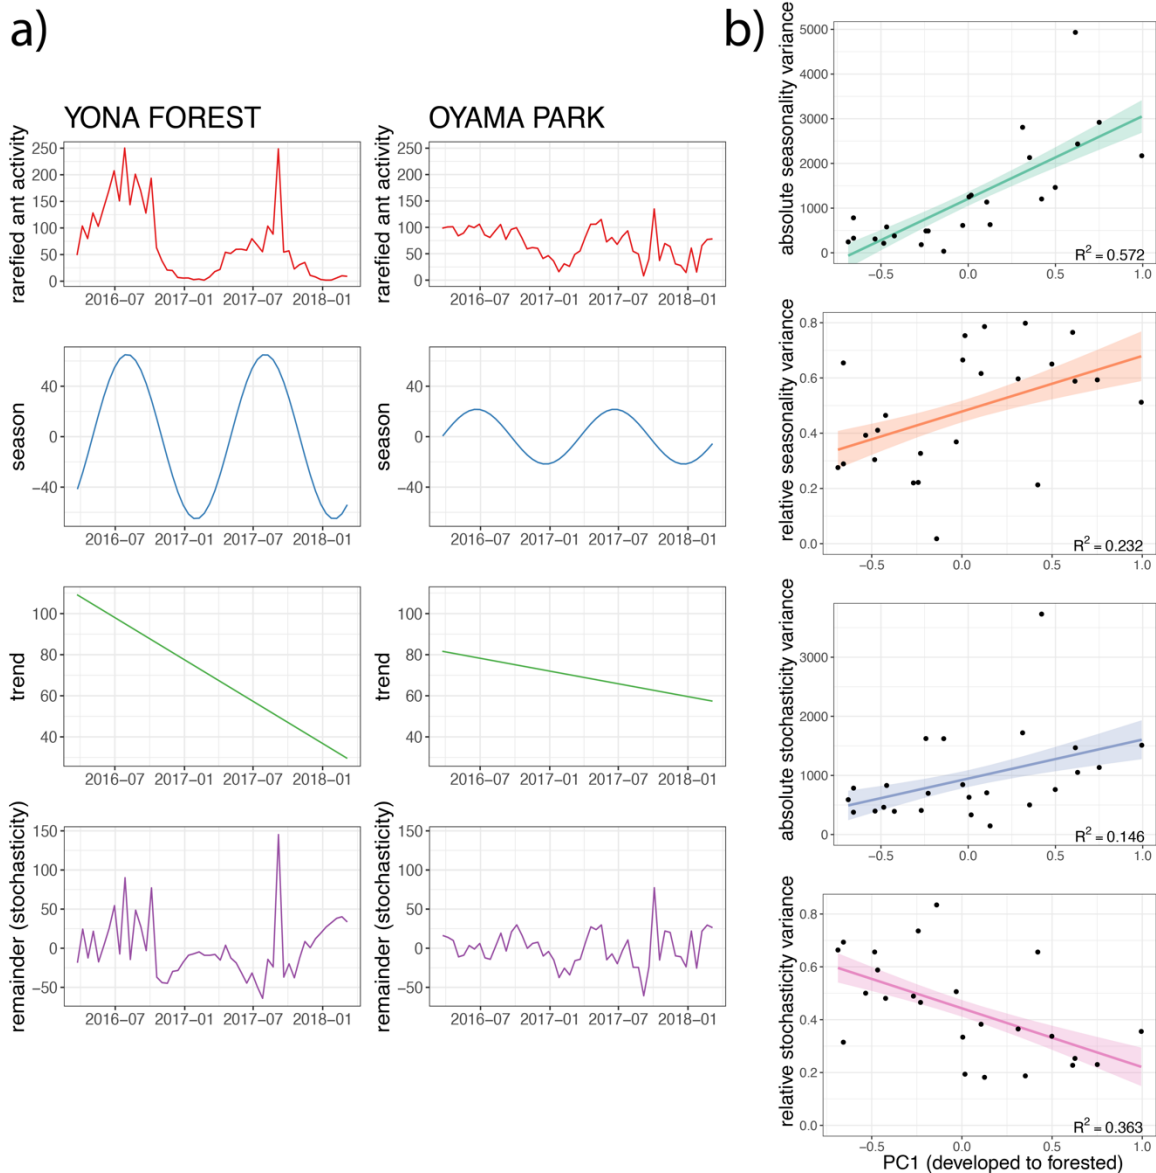

674

675 Figure 4. a) Time-series decomposition of rarefied ant activity for the sites with the most forest  
676 (Yona Forest) and most human development (Oyama Park) within a 1 km buffer. b)  
677 Relationships between absolute and relative variance of seasonality and stochastic temporal  
678 components and PC1 across all 24 sites, explaining the anthropogenic stress gradient (low: more  
679 developed, high: more forested). Relative variance here is calculated as individual component  
680 variance divided by summed variance of all components.

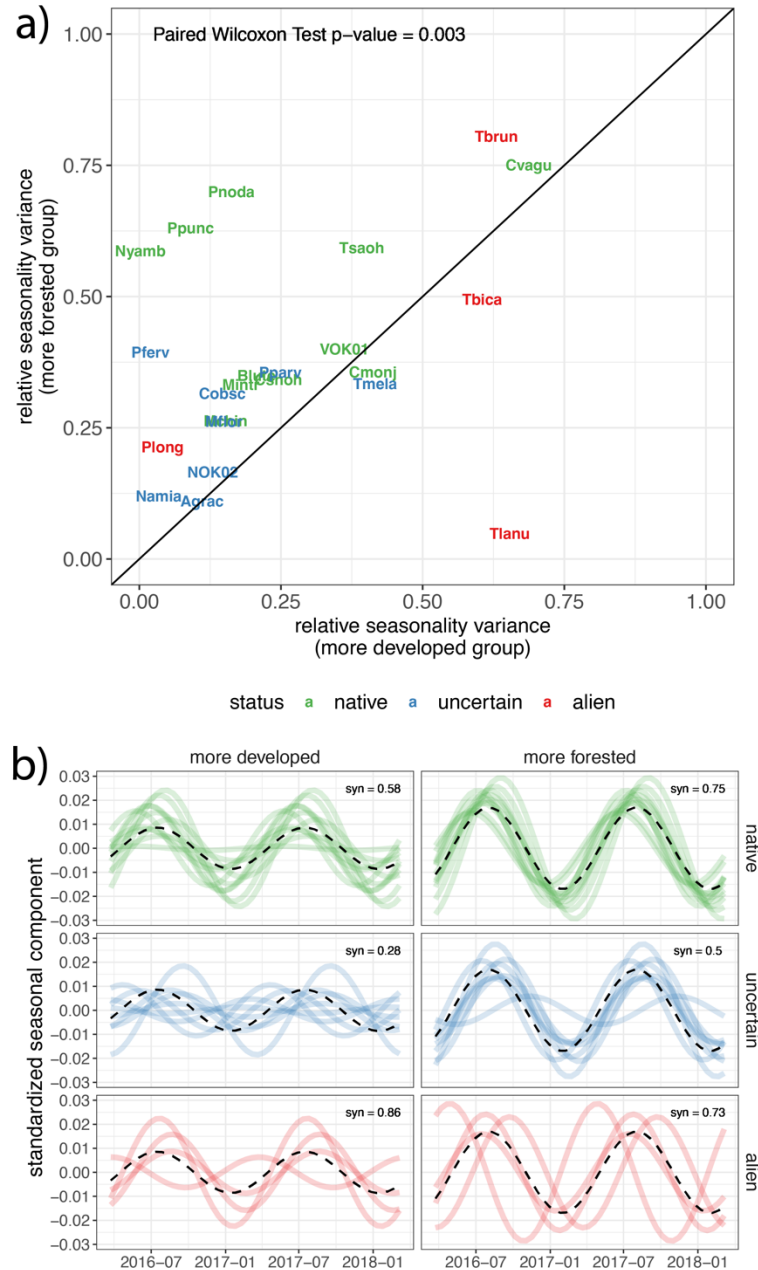

681

682 Figure 5. a) Relative seasonality variance calculated per ant species in two representative land-  
 683 cover groups each containing eight sites: more forested and more developed. Only species shared  
 684 between groups (abbreviations of those found in Table S2) and with total counts  $\geq 100$  were  
 685 retained, whereupon species counts were rarefied to the minimum between groups. On average,  
 686 species have a higher relative seasonality variance in the forested group (paired Wilcoxon Test;  $p$   
 687 = 0.003), and no apparent patterns exist regarding alien status. b) Seasonal component time-  
 688 series for each species (lines) found in the more forested and more developed groups,  
 689 standardized by total species activity and separated by invasive species status. The dashed black  
 690 line shows the mean standardized seasonality across all species per land-cover group, showing  
 691 much greater temporal mismatch in ant communities at sites with greater human development.

## 692 Supporting Information

### 693 A. Ant activity data details

694 As sites across the island were sampled in sequential groups rather than simultaneously for each  
695 biweekly period (differences are on the order of 7 days), to allow for appropriate site  
696 comparisons, we assigned each sample a time step (52 in total) based on the relative sampling  
697 order for that site. To this activity dataset, we filled in absence data when species that were  
698 observed at least once at a site were not observed for other time steps for that site in order to  
699 calculate temporal variability metrics. Values of NA ( $n = 8$ ) were assigned to samples that  
700 experienced trap malfunctions or data loss via extreme weather events and were removed from  
701 analyses.  
702

### 703 B. Rarefaction permutations

704 Community samples collected over time are typically biased by sampling error, which results in  
705 fluctuations in activity due to site placement or other external factors, but this bias can be  
706 reduced via data rarefaction (Gaston & McArdle, 1994). As natural differences in total  
707 community count across sites were high (from  $n = 3,616$  [Yona Forest] to  $n = 82,781$  [Sueyoshi  
708 Forest]), we rarefied site- and group-level count while retaining original activity patterns to  
709 reduce the effects of sampling error, allowing us to make more even comparisons of temporal  
710 variability. For site-level activity, we randomly resampled the individual counts of species  $i$  at  
711 time  $t$  for each site to equal the minimum total site count ( $n = 3,616$ ). For group-level activity,  
712 we first limited the species considered to those with total count greater than 100 for the two-year  
713 study period, then randomly resampled (with replacement) the individual counts of species  $i$  at  
714 time  $t$  for each group to equal that species' minimum total count between groups. We performed  
715 1000 iterations of each rarefaction and conducted all proceeding analyses on these iterations.  
716

### 717 C. Community and compositional variability calculations

718 We measured community temporal variability by calculating the coefficient of variation (CV) of  
719 summed ant count by site over the 2-year sampling period. We measured compositional temporal  
720 variability by calculating temporal beta diversity for each site community as the total variability  
721 of the species composition matrix (here, species  $\times$  time step) after a Hellinger transformation (to  
722 ensure purely relative count data; Legendre & De Cáceres, 2013) using the function *beta.div*  
723 from the R package *adespatial* (Dray et al., 2022). As an additional product of this function, we  
724 derived species contributions to beta diversity per site, which is calculated as species variance  
725 divided by the total community variance (summing to 1). We then summed these contributions  
726 for each invasive status category (native, uncertain, alien) to determine the contribution of each  
727 category. We calculated both indices of temporal variability on each rarefied site activity dataset,  
728 then found the mean values across datasets. These mean rarefied site values were used in  
729 subsequent models.  
730

### 731 D. Formulas for temporal decomposition and associated variance

732 We used the TSLM() function in the R package *fable* (O'Hara-Wild et al., 2021) to fit time-  
733 series linear models with the following formula:

734

$$735 \quad y_t = \beta_0 + \beta_1 t + \beta_2 x_1$$

736

737 where  $y_t$  is the total count of ants at a site, with  $t$  equal to the range 1 to  $T$ , the number of time  
738 intervals; and where  $x_1$  is the 1<sup>st</sup> order Fourier term  $\sin(\frac{2\pi t}{m})$ , with  $m$  equal to the number of  
739 seasonal periods (in this case,  $m = 2$  for 2 years).

740

741 We calculated the temporal components in the following ways:

742

$$743 \quad trend = \beta_0 + \beta_1 t$$

744

$$745 \quad season = y_t - trend - resid$$

746

$$747 \quad remainder = resid$$

748

749 where *resid* is the model residuals.

750

751 In addition to calculating absolute variance of temporal components, we calculated relative  
752 variance with the following formula:

753

$$754 \quad relative\ var_z = \frac{var(z)}{var(trend) + var(season) + var(remainder)}$$

755

756 where  $z$  is one of the temporal components: trend, season, or remainder.

757

## 758 E. Assessing effects of spatial autocorrelation on models

759 We first built models using ordinary least squares (OLS) regression to estimate the relationships  
760 between land cover and the variables of interest. As some OKEON sites are relatively close to  
761 others, we assessed the spatial autocorrelation present in the OLS model residuals by calculating  
762 Moran's I and testing with random permutations using the function *moran.randtest()* from the R  
763 package *adespatial* (999 repetitions; Dray et al., 2022). But as this test was not significant for  
764 any of the models ( $p > 0.05$ ), we fitted OLS models instead of more complex generalized least  
765 squares (GLS) models with spatial structure. We determined goodness-of-fit with the adjusted  
766 coefficient of determination (R-squared) and compared these between different count threshold  
767 choices.

768

## 769 F. Effects of count threshold choice

770 As we avoided bias in temporal variability estimates by limiting all count values to an assigned  
771 threshold, we examined how robust our results are over a range of different thresholds. We  
772 report results in the main text for the relatively conservative threshold of 500 set at the station-  
773 level, but additionally ran the same analyses with no threshold, and with thresholds 100, 200,  
774 1000, and 2000, applied at both the station- and site-levels. We observed some differences across



775 the different thresholding schema, but no threshold fundamentally changes our results (which we  
776 report for threshold 500 set at the station-level). The adjusted R-squared values for the metrics  
777 calculated were sensitive in varying degrees to threshold (Fig. S7), with the exception of  
778 compositional temporal variability—this is because our beta diversity calculation includes a  
779 Hellinger transformation that mollifies the effects of outliers in the data. Further, thresholding at  
780 the station- and site-levels showed the same general trends. The highest threshold considered  
781 (2000) for the station-level was most often associated with the lowest R-squared values. The  
782 absence of a threshold had the most dramatic differences. This reduced the R-squared value for  
783 functional temporal variability to 0.11 from a thresholded minimum of 0.40, and seasonality  
784 variance to 0.16 from 0.39. R-squared values for other metrics were similarly reduced, but more  
785 closely followed decreasing trends as thresholds became larger. These reductions in correlations  
786 with PC1 occurred because, without thresholding, sites with extreme count values for one or  
787 several species spike in functional variability (calculated with CV) and lose seasonality, and the  
788 existence of such spikes has little to do with land cover.  
789

790 Table S1. Pearson correlations between proportions of land-cover classes within 1 km buffers of  
791 sampling sites. “MISC” stands for miscellaneous and includes the classes for unclassified pixels  
792 and those classified as bare rock or soil. As pairwise correlations were high, we conducted a  
793 principal component analysis (PCA) to derive the main orthogonal land-cover gradients.  
794  
795

|             | AGRICULTURE | FOREST | WATER | GRASS | SAND | URBAN | MISC |
|-------------|-------------|--------|-------|-------|------|-------|------|
| AGRICULTURE | 1           |        |       |       |      |       |      |
| FOREST      | -0.89       | 1      |       |       |      |       |      |
| WATER       | -0.05       | 0.02   | 1     |       |      |       |      |
| GRASS       | 0.53        | -0.44  | 0.02  | 1     |      |       |      |
| SAND        | 0.54        | -0.48  | -0.04 | 0.23  | 1    |       |      |
| URBAN       | 0.56        | -0.84  | -0.08 | 0.01  | 0.20 | 1     |      |
| MISC        | 0.51        | -0.73  | 0.13  | 0.18  | 0.53 | 0.74  | 1    |

796

797 Table S2. Invasive status for all observed ant species based on existing literature and expert  
798 opinion.  
799

| <b>species</b>                      | <b>status</b> |
|-------------------------------------|---------------|
| <i>Aenictus ceylonicus</i>          | native        |
| <i>Aenictus lifuiae</i>             | native        |
| <i>Anoplolepis gracilipes</i>       | uncertain     |
| <i>Aphaenogaster concolor</i>       | native        |
| <i>Aphaenogaster irrigua</i>        | native        |
| <i>Brachyponera chinensis</i>       | native        |
| <i>Brachyponera luteipes</i>        | native        |
| <i>Camponotus bishamon</i>          | native        |
| <i>Camponotus devestivus</i>        | native        |
| <i>Camponotus monju</i>             | native        |
| <i>Camponotus</i> OK01              | native        |
| <i>Camponotus yambaru</i>           | native        |
| <i>Cardiocondyla kagutsuchi</i>     | uncertain     |
| <i>Cardiocondyla minutior</i>       | uncertain     |
| <i>Cardiocondyla obscurior</i>      | uncertain     |
| <i>Cardiocondyla wroughtonii</i>    | native        |
| <i>Carebara hannya</i>              | native        |
| <i>Carebara oni</i>                 | native        |
| <i>Carebara yamatonis</i>           | native        |
| <i>Colobopsis shohki</i>            | native        |
| <i>Crematogaster cf. matsumurai</i> | native        |

|                                 |           |
|---------------------------------|-----------|
| <i>Crematogaster nawai</i>      | native    |
| <i>Crematogaster vagula</i>     | native    |
| <i>Cryptopone tengu</i>         | native    |
| <i>Diacamma</i> OK01            | native    |
| <i>Discothyrea kamiteta</i>     | native    |
| <i>Ectomomyrmex</i> OK01        | native    |
| <i>Erromyrmica latinodis</i>    | native    |
| <i>Euponera pilosior</i>        | native    |
| <i>Hypoponera nippona</i>       | native    |
| <i>Hypoponera</i> OK01          | native    |
| <i>Hypoponera punctatissima</i> | alien     |
| <i>Hypoponera sauteri</i>       | native    |
| <i>Leptogenys confucii</i>      | native    |
| <i>Lioponera daikoku</i>        | native    |
| <i>Monomorium chinense</i>      | native    |
| <i>Monomorium floricola</i>     | uncertain |
| <i>Monomorium hiten</i>         | native    |
| <i>Monomorium intrudens</i>     | native    |
| <i>Monomorium pharaonis</i>     | alien     |
| <i>Myrmecina ryukyuensis</i>    | native    |
| <i>Nylanderia amia</i>          | uncertain |
| <i>Nylanderia</i> OK02          | uncertain |
| <i>Nylanderia</i> OK03          | uncertain |
| <i>Nylanderia ryukyuensis</i>   | native    |
| <i>Nylanderia yambaru</i>       | native    |
| <i>Ochetellus glaber</i>        | native    |

|                                 |           |
|---------------------------------|-----------|
| <i>Odontomachus kuroiwa</i>     | native    |
| <i>Ooceraea biro</i>            | uncertain |
| <i>Paratrechina longicornis</i> | alien     |
| <i>Pheidole fervens</i>         | uncertain |
| <i>Pheidole megacephala</i>     | alien     |
| <i>Pheidole noda</i>            | native    |
| <i>Pheidole parva</i>           | uncertain |
| <i>Pheidole pieli</i>           | native    |
| <i>Plagiolepis alluaudi</i>     | alien     |
| <i>Polyrhachis dives</i>        | native    |
| <i>Polyrhachis moesta</i>       | native    |
| <i>Ponera takaminei</i>         | native    |
| <i>Ponera tamon</i>             | native    |
| <i>Pristomyrmex punctatus</i>   | native    |
| <i>Proceratium japonicum</i>    | native    |
| <i>Protanilla lini</i>          | native    |
| <i>Rhopalomastix OK01</i>       | native    |
| <i>Solenopsis tipuna</i>        | native    |
| <i>Stigmatomma sakaii</i>       | native    |
| <i>Stigmatomma silvestrii</i>   | native    |
| <i>Strumigenys circothrix</i>   | native    |
| <i>Strumigenys emmae</i>        | uncertain |
| <i>Strumigenys exilirhina</i>   | native    |
| <i>Strumigenys hexamera</i>     | native    |
| <i>Strumigenys hirashimai</i>   | native    |
| <i>Strumigenys lewisi</i>       | native    |

|                                 |           |
|---------------------------------|-----------|
| <i>Strumigenys mazu</i>         | native    |
| <i>Strumigenys membranifera</i> | uncertain |
| <i>Strumigenys minutula</i>     | native    |
| <i>Strumigenys</i> OK01         | uncertain |
| <i>Strumigenys strigatella</i>  | native    |
| <i>Tapinoma melanocephalum</i>  | uncertain |
| <i>Tapinoma saohime</i>         | native    |
| <i>Technomyrmex brunneus</i>    | alien     |
| <i>Temnothorax indra</i>        | native    |
| <i>Temnothorax</i> OK01         | native    |
| <i>Tetramorium bicarinatum</i>  | alien     |
| <i>Tetramorium kraepelini</i>   | uncertain |
| <i>Tetramorium lanuginosum</i>  | alien     |
| <i>Tetramorium nipponense</i>   | native    |
| <i>Tetramorium simillimum</i>   | alien     |
| <i>Tetramorium smithi</i>       | alien     |
| <i>Trichomyrmex destructor</i>  | uncertain |
| <i>Vollenhovia</i> OK01         | native    |

801 Table S3. Results from linear regression models built with two land-cover PCA axes: PC1,  
 802 explaining the forested-developed gradient, and PC2, explaining the rural-urban gradient. All  
 803 model residuals were tested for spatial autocorrelation by calculating Moran's I and testing with  
 804 random permutations (*moran.randtest()* from the R package *adespatial*; 999 repetitions), yet  
 805 none had significant results.  
 806

| Response variable              | PC1       |          |            |          | PC2      |            |          | Adj. R <sup>2</sup> | Moran <i>p</i> |
|--------------------------------|-----------|----------|------------|----------|----------|------------|----------|---------------------|----------------|
|                                | Intercept | Estimate | Std. Error | <i>p</i> | Estimate | Std. Error | <i>p</i> |                     |                |
| Total activity (natural log)   | 10.082    | -1.575   | 0.206      | 0        | NA       | NA         | NA       | 0.714               | 0.269          |
| Total richness (rarefied)      | 22.742    | 3.453    | 1.557      | 0.037    | NA       | NA         | NA       | 0.145               | 0.727          |
| Native richness (rarefied)     | 13.662    | 8.351    | 1.367      | 0        | NA       | NA         | NA       | 0.612               | 0.789          |
| Uncertain richness (rarefied)  | 5.863     | -3.585   | 1.019      | 0.002    | NA       | NA         | NA       | 0.331               | 0.179          |
| Alien richness (rarefied)      | 3.217     | -1.314   | 0.509      | 0.017    | NA       | NA         | NA       | 0.198               | 0.59           |
| Total richness (observed)      | 30.708    | NA       | NA         | NA       | NA       | NA         | NA       | 0                   | 0.887          |
| Native richness (observed)     | 18.708    | 7.483    | 1.686      | 0        | -7.594   | 4.611      | 0.114    | 0.47                | 0.8            |
| Uncertain richness (observed)  | 7.875     | -5.188   | 1.516      | 0.002    | NA       | NA         | NA       | 0.318               | 0.312          |
| Alien richness (observed)      | 4.125     | -2.052   | 0.643      | 0.004    | NA       | NA         | NA       | 0.285               | 0.271          |
| Total richness (estimated)     | 38.923    | NA       | NA         | NA       | NA       | NA         | NA       | 0                   | 0.862          |
| Native richness (estimated)    | 23.781    | 13.457   | 3.646      | 0.001    | NA       | NA         | NA       | 0.354               | 0.767          |
| Uncertain richness (estimated) | 8.427     | -5.717   | 1.636      | 0.002    | NA       | NA         | NA       | 0.328               | 0.487          |
| Alien richness (estimated)     | 4.292     | -2.092   | 0.802      | 0.016    | NA       | NA         | NA       | 0.202               | 0.3            |

|                                    |          |          |             |       |        |       |       |       |       |
|------------------------------------|----------|----------|-------------|-------|--------|-------|-------|-------|-------|
| Functional temporal variability    | 0.67     | 0.405    | 0.059       | 0     | NA     | NA    | NA    | 0.667 | 0.269 |
| Compositional temporal variability | 0.23     | 0.141    | 0.024       | 0     | NA     | NA    | NA    | 0.601 | 0.703 |
| Native SCBD                        | 0.53     | 0.237    | 0.059       | 0.001 | NA     | NA    | NA    | 0.397 | 0.776 |
| Uncertain SCBD                     | 0.229    | -0.16    | 0.05        | 0.004 | NA     | NA    | NA    | 0.283 | 0.524 |
| Alien SCBD                         | 0.257    | -0.087   | 0.05        | 0.094 | NA     | NA    | NA    | 0.082 | 0.465 |
| Seasonal variability (absolute)    | 1209.034 | 1850.927 | 328.6<br>26 | 0     | NA     | NA    | NA    | 0.572 | 0.918 |
| Seasonal variability (relative)    | 0.478    | 0.201    | 0.081       | 0.022 | -0.373 | 0.222 | 0.108 | 0.232 | 0.39  |
| Trend variability (absolute)       | 194.354  | 311.24   | 90.18<br>5  | 0.002 | NA     | NA    | NA    | 0.322 | 0.567 |
| Trend variability (relative)       | 0.079    | NA       | NA          | NA    | NA     | NA    | NA    | 0     | 0.722 |
| Stochastic variability (absolute)  | 946.566  | 660.74   | 297.5<br>68 | 0.037 | NA     | NA    | NA    | 0.146 | 0.591 |
| Stochastic variability (relative)  | 0.443    | -0.223   | 0.066       | 0.003 | 0.345  | 0.18  | 0.069 | 0.363 | 0.403 |

807

808



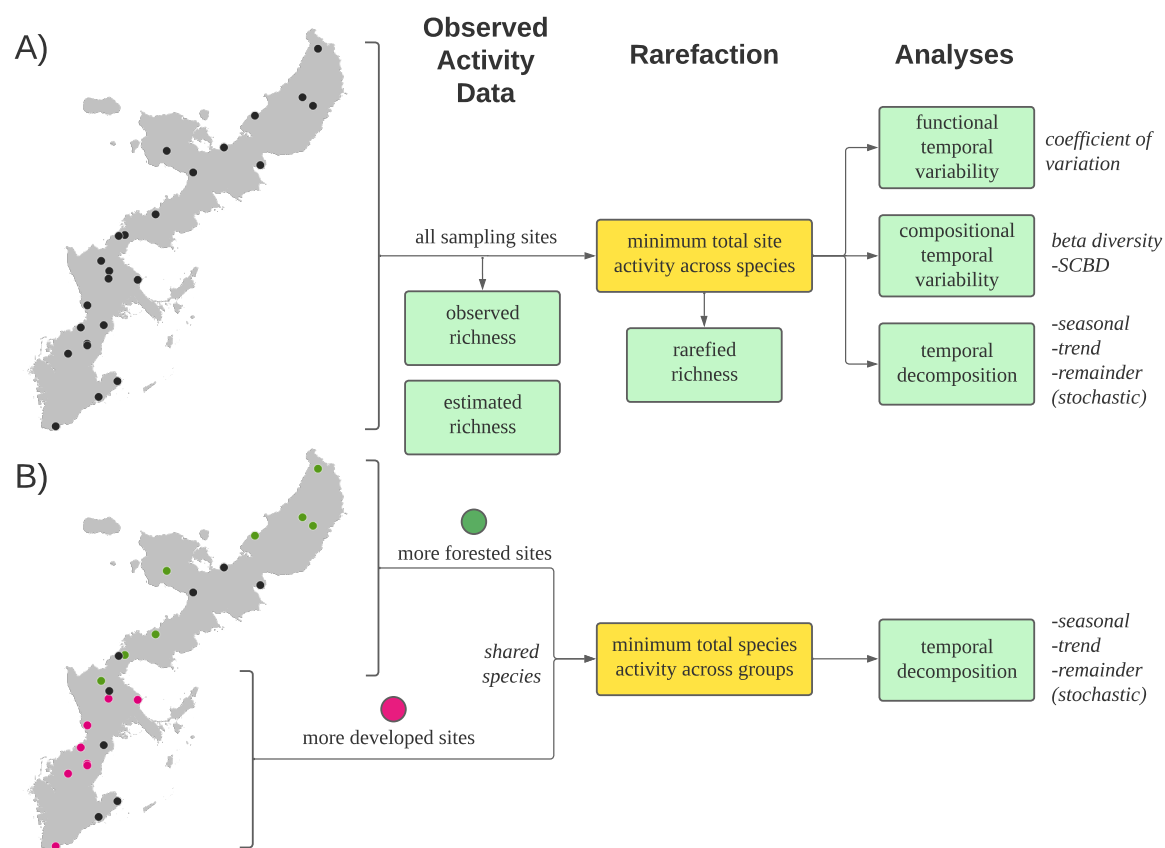

809

810

811 Figure S1. Conceptual workflow schematic describing the analysis steps. A) The main analysis  
 812 uses ant activity data from all sites. Richness is calculated for observed data and estimated via  
 813 Hill numbers, then the dataset is rarefied by randomly resampling individual workers per site to  
 814 match the minimum total site activity; rarefied richness is calculated from this rarefied dataset.  
 815 Next, the following analyses are conducted: functional temporal variability, compositional  
 816 temporal variability (including species contribution to beta diversity [SCBD]), and temporal  
 817 decompositions to derive seasonal, trend, and remainder (stochastic) components. B) The group-  
 818 level analysis first splits sites into two groups (green and pink points) based on land-cover PC1,  
 819 explaining the forested-developed gradient. Both groups share the same species, and those with  
 820 mid-level PC1 values are excluded (black points). These grouped data are then rarefied by  
 821 randomly resampling individual workers per species within each group to match the minimum  
 822 total species activity between groups. The same temporal decomposition is then conducted on  
 823 these grouped data.

824

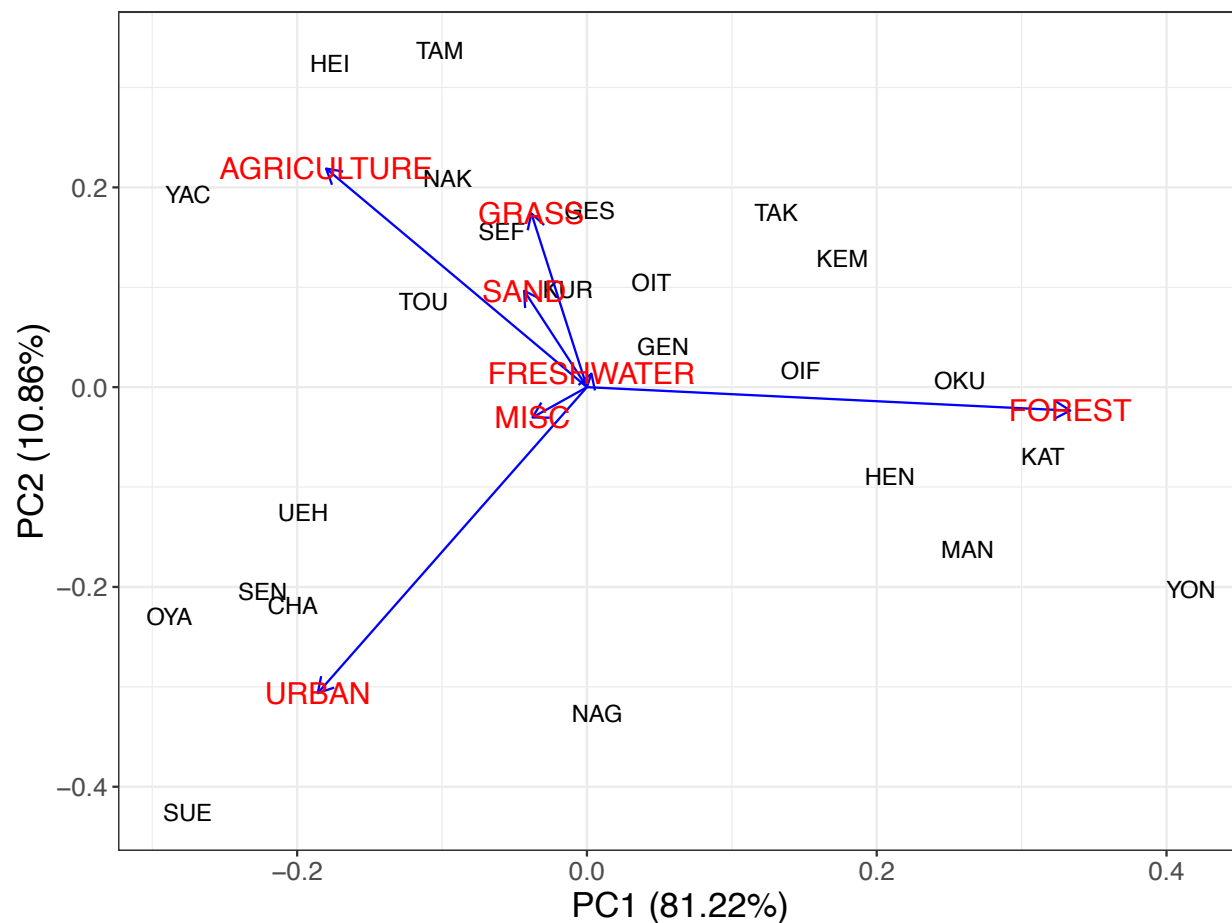

825

826 Figure S2. Biplot of the principal component analysis for the land-cover proportion dataset. PC1  
827 explains the main anthropogenic stress gradient (low: more forested, high: more developed),  
828 while PC2 explains the rural (high; agriculture and/or grass) to urban (low) gradient.  
829

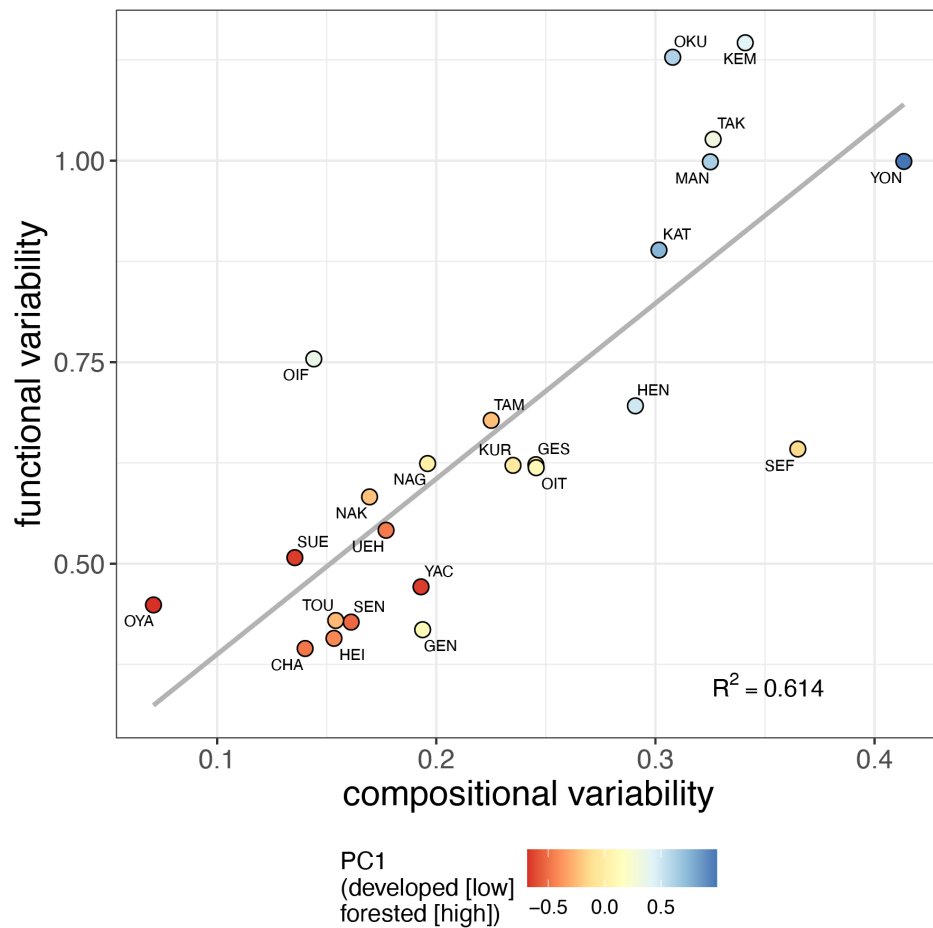

830  
831 Figure S3. Plot of compositional variability by functional variability, showing the sampling sites  
832 with colors corresponding to the forested-developed gradient (PC1), where higher values (blue)  
833 are more forested and lower values (red) have more human development. Site abbreviations  
834 correspond to those used in Figure 1. The gray line shows the relationship between two  
835 variabilities modeled with linear regression.  
836  
837

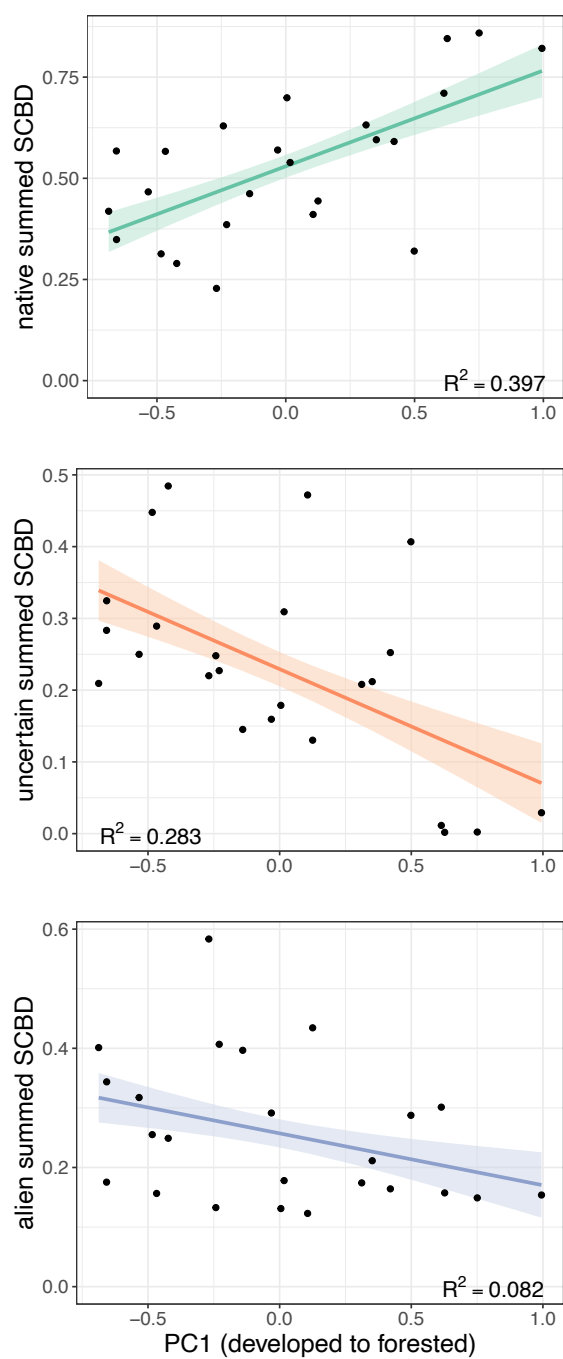

838

839 Figure S4. Relationships between PC1 and summed species contributions to beta diversity  
840 (SCBD) for native, uncertain, and alien species for the rarefied activity data. PC1 explains the  
841 anthropogenic stress gradient (low: more developed, high: more forested).  
842

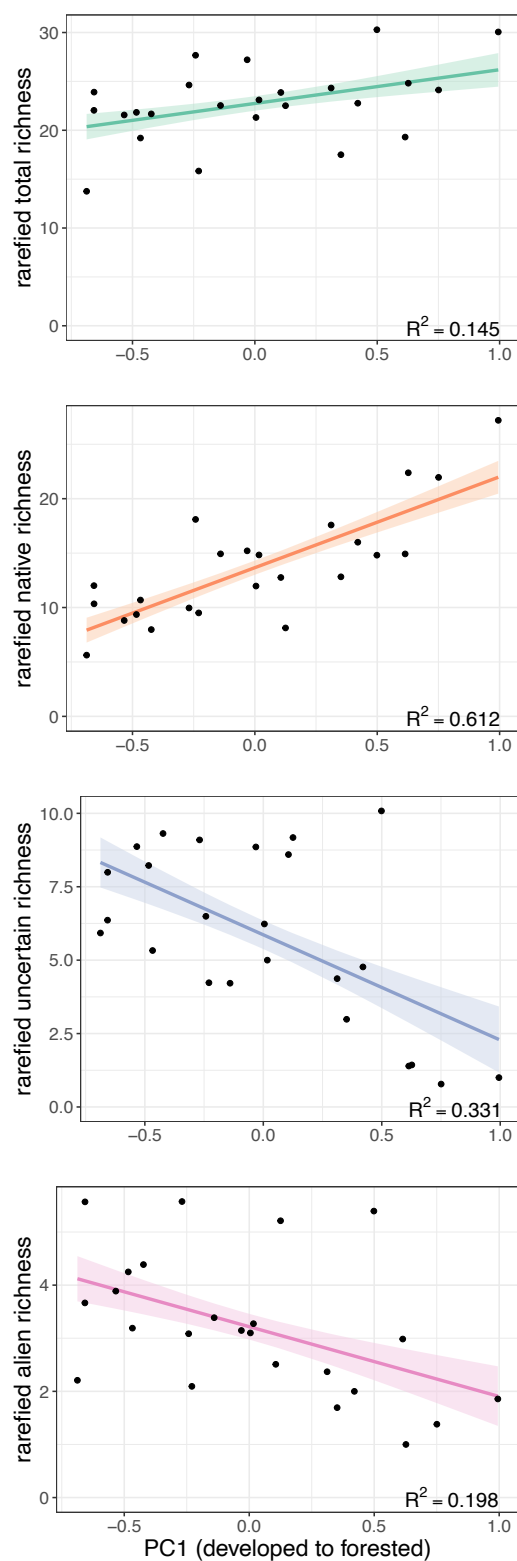

843

844 Figure S5. Relationships between PC1 and total richness, as well as richness of native,  
845 and alien species for the rarefied activity data. PC1 explains the anthropogenic stress gradient  
846 (low: more developed, high: more forested).

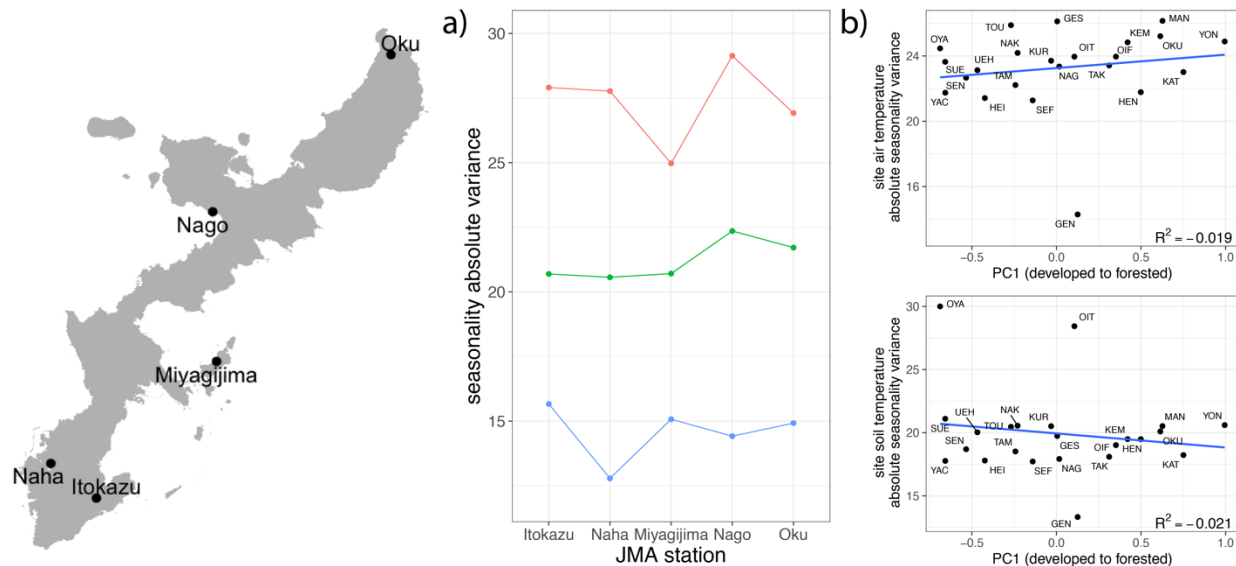

847  
848 Figure S6. Absolute seasonality variance of temperature at the a) regional and b) site-level scales  
849 over the two-year study period (2016 – 2018). Regional temperature measurements were taken  
850 from Japanese Meteorological Association weather stations, and station names correspond to  
851 those on the map. Site-level temperature measurements were taken for air and soil at one station  
852 per sample site. Oyama Park (OYA) and OIST Open (OIT) were the only sites with sensors not  
853 located below forest canopy, and thus have higher variance for soil temperature seasonality.  
854

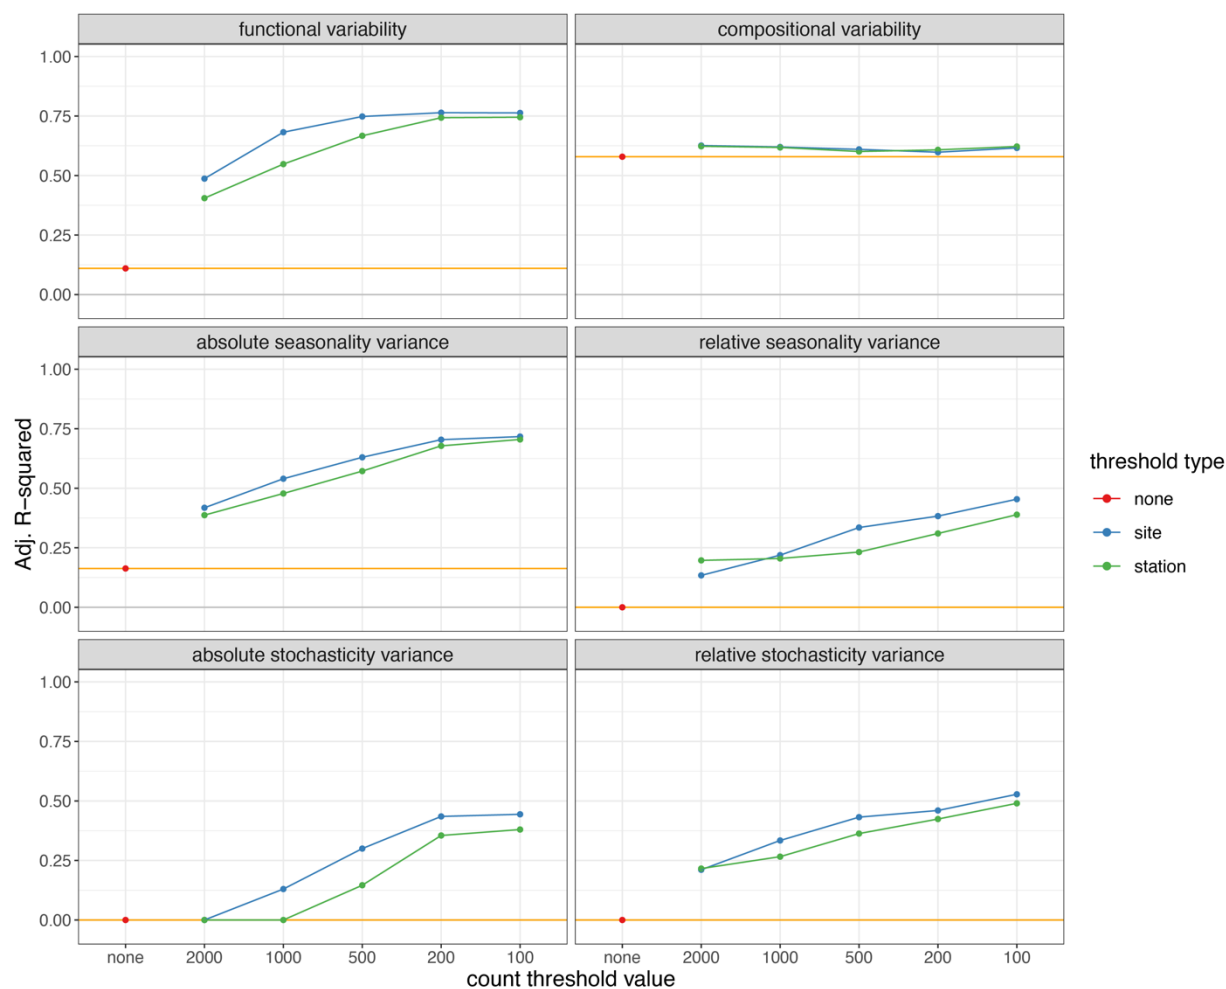

855

856 Figure S7. The adjusted R-squared value for the metrics measured in this study at different count  
857 thresholds and spatial levels for thresholding (station, site). The threshold value “none” is used as  
858 a reference and is symbolized by the red point and orange line. For reference, the analysis  
859 described in this paper is a threshold value of 500 at the station level.  
860
